# Supplementary material for: Systematic review of global clinical practice guidelines for neonatal hyperbilirubinemia
Source: PubMed Central journal article supplement — BMJ Open. 2021 Jan 18;11(1):e040182. doi: 10.1136/bmjopen-2020-040182 (PMC7817798; doi:10.1136/bmjopen-2020-040182), 2021-01-18
Supplement: bmjopen-2020-040182.draft_revisions.pdf [file bmjopen-2020-040182.draft_revisions.pdf]

# BMJ Open

BMJ Open is committed to open peer review. As part of this commitment we make the peer review history of every article we publish publicly available.

When an article is published we post the peer reviewers' comments and the authors' responses online. We also post the versions of the paper that were used during peer review. These are the versions that the peer review comments apply to.

The versions of the paper that follow are the versions that were submitted during the peer review process. They are not the versions of record or the final published versions. They should not be cited or distributed as the published version of this manuscript.

BMJ Open is an open access journal and the full, final, typeset and author-corrected version of record of the manuscript is available on our site with no access controls, subscription charges or pay-per-view fees (<http://bmjopen.bmj.com>).

If you have any questions on BMJ Open's open peer review process please email [info.bmjopen@bmj.com](mailto:info.bmjopen@bmj.com)

# BMJ Open

## A systematic review of global clinical practice guidelines for neonatal hyperbilirubinemia

|                               |                                                                                                                                                                                                                                                                                                                                                                                                                                                                                                                                                                                                                                                                                                                                                                                                                                                                                                                                                                                                                                                                                                                                                                                                                                                                                                                                                                                         |
|-------------------------------|-----------------------------------------------------------------------------------------------------------------------------------------------------------------------------------------------------------------------------------------------------------------------------------------------------------------------------------------------------------------------------------------------------------------------------------------------------------------------------------------------------------------------------------------------------------------------------------------------------------------------------------------------------------------------------------------------------------------------------------------------------------------------------------------------------------------------------------------------------------------------------------------------------------------------------------------------------------------------------------------------------------------------------------------------------------------------------------------------------------------------------------------------------------------------------------------------------------------------------------------------------------------------------------------------------------------------------------------------------------------------------------------|
| Journal:                      | <i>BMJ Open</i>                                                                                                                                                                                                                                                                                                                                                                                                                                                                                                                                                                                                                                                                                                                                                                                                                                                                                                                                                                                                                                                                                                                                                                                                                                                                                                                                                                         |
| Manuscript ID                 | bmjopen-2020-040182                                                                                                                                                                                                                                                                                                                                                                                                                                                                                                                                                                                                                                                                                                                                                                                                                                                                                                                                                                                                                                                                                                                                                                                                                                                                                                                                                                     |
| Article Type:                 | Original research                                                                                                                                                                                                                                                                                                                                                                                                                                                                                                                                                                                                                                                                                                                                                                                                                                                                                                                                                                                                                                                                                                                                                                                                                                                                                                                                                                       |
| Date Submitted by the Author: | 08-May-2020                                                                                                                                                                                                                                                                                                                                                                                                                                                                                                                                                                                                                                                                                                                                                                                                                                                                                                                                                                                                                                                                                                                                                                                                                                                                                                                                                                             |
| Complete List of Authors:     | Zhang, Meng; Sichuan University West China Second University Hospital, Department of Pediatrics; Sichuan University, Sichuan University, Key Laboratory of Obstetrics & Gynecologic and Pediatric Diseases and Birth Defects of the Ministry of Education<br>He, Yang; Sichuan University West China Second University Hospital, Department of Pediatrics; Sichuan University, Key Laboratory of Obstetrics & Gynecologic and Pediatric Diseases and Birth Defects of the Ministry of Education<br>Li, Wenxing; Sichuan University West China Second University Hospital, Department of Pediatrics; Sichuan University, Key Laboratory of Obstetrics & Gynecologic and Pediatric Diseases and Birth Defects of the Ministry of Education<br>Chen, Zhong; Sichuan University West China Second University Hospital, Department of Pediatrics; Sichuan University, Key Laboratory of Obstetrics & Gynecologic and Pediatric Diseases and Birth Defects of the Ministry of Education<br>Tang, Jun; Sichuan University West China Second University Hospital, Department of Pediatrics; Sichuan University, Key Laboratory of Obstetrics & Gynecologic and Pediatric Diseases and Birth Defects of the Ministry of Education<br>Xiong, tao; West China Second University Hospital, Sichuan University, Department of Pediatrics;<br>Youping, Li; West China Hospital of Sichuan University, |
| Keywords:                     | NEONATOLOGY, Developmental neurology & neurodisability < PAEDIATRICS, Protocols & guidelines < HEALTH SERVICES ADMINISTRATION & MANAGEMENT                                                                                                                                                                                                                                                                                                                                                                                                                                                                                                                                                                                                                                                                                                                                                                                                                                                                                                                                                                                                                                                                                                                                                                                                                                              |
|                               |                                                                                                                                                                                                                                                                                                                                                                                                                                                                                                                                                                                                                                                                                                                                                                                                                                                                                                                                                                                                                                                                                                                                                                                                                                                                                                                                                                                         |

SCHOLARONE™  
Manuscripts

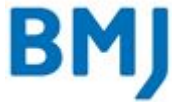

I, the Submitting Author has the right to grant and does grant on behalf of all authors of the Work (as defined in the below author licence), an exclusive licence and/or a non-exclusive licence for contributions from authors who are: i) UK Crown employees; ii) where BMJ has agreed a CC-BY licence shall apply, and/or iii) in accordance with the terms applicable for US Federal Government officers or employees acting as part of their official duties; on a worldwide, perpetual, irrevocable, royalty-free basis to BMJ Publishing Group Ltd ("BMJ") its licensees and where the relevant Journal is co-owned by BMJ to the co-owners of the Journal, to publish the Work in this journal and any other BMJ products and to exploit all rights, as set out in our [licence](#).

The Submitting Author accepts and understands that any supply made under these terms is made by BMJ to the Submitting Author unless you are acting as an employee on behalf of your employer or a postgraduate student of an affiliated institution which is paying any applicable article publishing charge ("APC") for Open Access articles. Where the Submitting Author wishes to make the Work available on an Open Access basis (and intends to pay the relevant APC), the terms of reuse of such Open Access shall be governed by a Creative Commons licence – details of these licences and which [Creative Commons](#) licence will apply to this Work are set out in our licence referred to above.

Other than as permitted in any relevant BMJ Author's Self Archiving Policies, I confirm this Work has not been accepted for publication elsewhere, is not being considered for publication elsewhere and does not duplicate material already published. I confirm all authors consent to publication of this Work and authorise the granting of this licence.

1  
2  
3 **A systematic review of global clinical practice guidelines for neonatal**  
4 **hyperbilirubinemia**

5 Meng Zhang, MD<sup>a,b</sup>, Yang He, MD<sup>a,b</sup>, Wenxing Li, MD<sup>a,b</sup>, Zhong Chen, MD<sup>a,b</sup>, Jun  
6 Tang, MD, PhD<sup>a,b</sup>, Tao Xiong, MD, PhD<sup>a,b</sup>, Youping Li, MD, PhD<sup>c</sup>

7  
8 <sup>a</sup>West China Second Hospital, Sichuan University, Chengdu, P.R.China; and <sup>b</sup>Key  
9 Laboratory of Obstetrics & Gynecologic and Pediatric Diseases and Birth Defects of  
10 the Ministry of Education, Sichuan University, Chengdu, P.R.China; <sup>c</sup>Chinese  
11 Evidence-based Medicine Center, West China Hospital, Sichuan University,  
12 Chengdu, P.R.China

13  
14 **Address correspondence to:** Jun Tang, Department of Pediatrics, West China  
15 Second Hospital, Sichuan University, No. 20, Section 3, Renmin south road, Chengdu  
16 610041, P.R.China, [[tj1234753@sina.com](mailto:tj1234753@sina.com)]

17  
18 **Keyword:** neonatal hyperbilirubinemia, neonatal jaundice, clinical practice  
19 guidelines, systematic review

20  
21 **Word count:** 2575  
22  
23  
24  
25  
26  
27  
28  
29  
30  
31  
32  
33  
34  
35  
36  
37  
38  
39  
40  
41  
42  
43  
44  
45  
46  
47  
48  
49  
50  
51  
52  
53  
54  
55  
56  
57  
58  
59  
60

## Abstract

**Objective:** Jaundice is one of the most common clinical symptoms in newborns. To improve patient outcomes, evidence-based and implementable guidelines were required. In this study, we systematically assessed the quality of guidelines by using the AGREE-II instrument and summarized the specific recommendations of neonatal hyperbilirubinemia, aiming to provide suggestions for guideline development in the future.

**Methods:** We searched for relevant studies of Pubmed, Embase, Medline and guideline databases on April 10th 2020. The studies were screened by two independent reviewers according to our inclusion criteria. Two reviewers independently extracted descriptive data. Four appraisers assessed the guidelines using the AGREE-II instrument.

**Results:** Our systematic review appraised 12 clinical practice guidelines for the diagnosis and management of neonatal hyperbilirubinemia. The 12 guidelines achieved an average score from 36% to 89%. The guidelines received the highest scores in clarity of presentation and lowest scores for rigour of development. Most recommendations of diagnosis were relatively consistent, while inconsistencies still existed in the risk factors, initiating threshold of treatment and pharmacotherapy.

**Conclusions:** Our study revealed that current guidelines varied in quality of developing process and inconsistencies existed in recommendations despite some similarities. Future guidelines should pay more attention to the quality of methodologies in guideline development and more qualified evidence was needed to standardize the initiating threshold of treatment for neonatal hyperbilirubinemia.

**Funding Source:** This work was supported by the National Science Foundation of China (No. 81630038, 81971433, 81971428, 81771634, 81701499), the National Key R&D Program of China (2017YFA0104200), the Grants from Ministry of Education of China (IRT0935), and the Grant of clinical discipline program (Neonatology) from the Ministry of Health of China (1311200003303).

**Conflict of Interest:** All authors have no conflicts of interest to disclose.

**Data availability:** All data relevant to the study are included in the article.

**Patient and Public Involvement Statement:** It was not possible to involve patients or the public in the design, or conduct, or reporting, or dissemination plans of our research

## Article Summary

### Strengths and limitations of this study:

- This study is the first English systematic appraisal of guidelines targeted to neonates with jaundice.
- The strengths also included the validated AGREE II instrument used and four independent reviewers to minimize subjective bias.
- A Chinese-language guideline by Chinese Pediatric society were appraised.
- The AGREE-II was used to evaluate guidelines with less attention to detailed recommendations.
- We only assessed guidelines through reported literature without other ways like contacting guidelines developers.

## Introduction

Neonatal jaundice, with the elevation of total serum bilirubin (TSB), is one of the most common clinical symptoms in newborns, especially in preterm infants. Jaundice affected at least 60% of full-term and 80% of preterm neonates<sup>1</sup>, suggesting that about one tenth newborn babies were likely to develop hyperbilirubinemia<sup>2</sup>. Additionally, neonatal hyperbilirubinemia accounted for 1309.3 deaths per 100,000 livebirths and was the seventh cause globally among neonatal deaths in the first week of life<sup>3</sup>. Effective and timely treatment with phototherapy or exchange transfusion can decrease the occurrence of neurologic dysfunction.

Clinical practice guidelines aim at helping people to make clinical, policy-related and system-related decisions<sup>4</sup>. Evidence-based, timely and implementable guidelines are as bridges between research and clinical practice. They enhance high-quality care and consequently improve overall patient outcomes<sup>5 6</sup>. Although several organizations from different regions have developed clinical practice guidelines, they may vary widely in quality. Moreover, the criteria for the diagnosis and treatment in published guidelines vary between regions and countries.

The Appraisal of Guidelines for Research & Evaluation (AGREE) Instrument is a tool that assesses the methodological rigour and transparency in which a guideline is developed<sup>7</sup>. In this study, we systematically reviewed and assessed the quality of guidelines on neonatal hyperbilirubinemia by using the AGREE-II instrument, aiming to provide suggestions for guideline development in the future.

## Method

### Selection criteria

We included the clinical practice guidelines for the diagnosis and management of hyperbilirubinemia in the newborn infants. The guidelines were included if they followed the criteria: (1) published in English or Chinese; (2) based on systematic evidence synthesis and containing specific statements to guide decisions about hyperbilirubinemia; (3) including recommendations of diagnosis and treatment of neonatal hyperbilirubinemia; (4) published between 2000 and 2020, and only the most recent editions of updated guidelines was considered.

### Search strategy

A systematic literature search was performed in April 10th 2020. We searched for relevant studies of the following databases: Pubmed, Embase, Medline. In addition, we searched following guideline database and website of organization: the Guidelines International Network (GIN), the National Health Service (NHS) Evidence website, the National Institute for Health and Care Excellence (NICE) website, the Scottish Intercollegiate Guidelines Network (SIGN) website, the Turning Research Into Practice Database (TRIP) and the Wan fang Database. The titles and abstracts of searched citations were screened by two independent reviewers ( MZ, YH ). Any

1  
2  
3 discrepancies between the reviewers were resolved by discussion. The detail  
4 searching strategy of Pubmed was shown in the supplementary material.  
5  
6

### 7 **Guideline characteristic**

8 Two independent reviewers (MZ, YH) extracted general characteristics of included  
9 guidelines: country, founding organization, year of publication or updating status,  
10 method of evidence identification and funding.  
11  
12

### 13 **Appraisal of guideline quality**

14 Four appraisers (MZ, YH, WXL, ZC) independently assessed the selected guidelines  
15 using the AGREE-II instrument. AGREE II is an international, validated and  
16 rigorously developed tool to evaluate the quality of clinical practice guidelines and  
17 consensus statements<sup>8</sup>. The AGREE II consists of 23 key items organized within 6  
18 domains (Scope and Purpose, Stakeholder Involvement, Rigour of Development,  
19 Clarity of Presentation Applicability, Editorial Independence) followed by 2 global  
20 rating items (Overall Assessment). Each domain points to a unique dimension of  
21 guideline quality<sup>9</sup>. Each of the AGREE II items are rated on a 7-point scale (1–  
22 strongly disagree to 7–strongly agree). Domain scores are calculated by summing up  
23 all the scores of the individual items in a domain and by scaling the total as a  
24 percentage of the maximum possible score for that domain<sup>9</sup>. The score for each  
25 domain of each document is calculated as follows: (obtained score–minimal possible  
26 score)/ (maximal possible score - minimal possible score)<sup>7</sup>. All reviewers had been  
27 trained online through the AGREE training tools. Every discrepancy over 3 points  
28 differences of score would be discussed in consensus meeting.  
29  
30  
31  
32  
33  
34  
35

### 36 **Analysis**

37 We extracted descriptive data from guideline recommendations to identify  
38 consistencies and discrepancies. Then, the recommendations were summarized  
39 according to different items which related to diagnosis and treatment strategies of  
40 neonatal hyperbilirubinemia, such as the test for early prediction and diagnosis of  
41 neonatal jaundice, the timing to start phototherapy and exchange transfusion for  
42 neonatal hyperbilirubinemia, the recommendation of drug using, the criterion for  
43 discharge and timing or frequency of follow-up.  
44  
45  
46  
47

## 48 **Result**

### 49 **Search result**

50 Figure 1 showed the process by which we searched and selected the guidelines. The  
51 systematic search retrieved 725 records, of which we excluded 701 after deleting  
52 duplicates and reviewing titles and abstracts because of not meeting eligibility criteria.  
53 Consequently, after the full-text evaluation of remaining records, 12 CPGs were  
54 excluded for the following reasons: not in English or Chinese, not original guidelines,  
55 not clinical practice guidelines or consensus. Ultimately, we included twelve clinical  
56 practice guidelines from twelve different national or regional organizations.  
57  
58  
59  
60

### General characteristics of guidelines

Table 1 and 2 shows the summary of general characteristics of the included clinical practice guidelines. Twelve clinical practice guidelines documents were published by national or regional organizations including American Academy of Pediatrics Subcommittee on Hyperbilirubinemia (AAP)<sup>10</sup>, Canadian Pediatric Society (CPS) Fetus and Newborn Committee<sup>11</sup>, Chinese Pediatric society (ChPS) Chinese medical Association<sup>12</sup>, Israel Neonatal Society (INS)<sup>13</sup>, Italian Society of Neonatology (ISN)<sup>14</sup>, Malaysia Health Technology Assessment Section (MaHTAS)<sup>15</sup>, National Institute for Health and Care Excellence (NICE) in the United Kingdom<sup>16</sup>, Norwegian Pediatric Association (NPA)<sup>17</sup>, Queensland Clinical Guidelines (QCG) in Australia<sup>18</sup>, Spanish Association of Pediatrics (SAP)<sup>19</sup>, Swiss Society of Neonatology (SSN)<sup>20</sup> and Turkish Pediatric Association (TPA)<sup>21</sup>. Five of these guidelines are new and the rest of them have been updated or reaffirmed. Four guidelines of the United States<sup>10</sup>, Canada<sup>11</sup>, Italy<sup>14</sup> and Swiss<sup>20</sup> included their target population as neonates with more than 35 weeks of gestation while the others covered all preterm and term babies. Eight organizations reported undertaking a systematic review and appraisal of the evidence and were explicit about the level of evidence that underpinned their recommendations. Three groups were funded by governmental institutions (QCG<sup>18</sup>, NICE<sup>16</sup> and MaHTAS<sup>15</sup>), one declared no financial support (TPA<sup>21</sup>); the remainder did not disclose a funding source.

### Appraisal of guidelines

Table 3 shows the scores for each guideline for the six domains with the AGREE II instrument. The overall quality of the guideline development process varied widely both between guidance documents and within guidance documents between domains. The 12 guidelines achieved an average score from 36.3% to 89.3%. Most had average scores below 50% in four of the six domains, only two received an average over 50%. The included guidelines received the highest scores in domains of clarity of presentation and lowest scores for rigour of development.

Domain 1: scope and purpose had a mean score of 88.8%±6.5% and the MaHTAS<sup>15</sup> scored the highest at 98.6%. Domain 2: stakeholder involvement received a mean score of 47.6%±22.4% with the ChPS<sup>12</sup> having the lowest score at 9.7%. Domain 3: rigor of development had the poorest mean score of 31.9%±22.6%. NICE<sup>16</sup> scoring the highest for this domain at 85.9% with the most extensive development process while TPA<sup>21</sup> received the lowest at only 9.9%. Domain 4: clarity of presentation obtained the highest mean of 91.7%±5.7%. For this domain, most of the guidelines obtained a score over 90%. Domain 5: applicability had a poor mean score of 43.0%±18.9% with five guidelines scoring under 30%. Domain 6: editorial independence also had a poor mean score at 36.8%±36.1% and for this domain four CPGs obtained 0%. In terms of overall quality, half of the guidelines received an average score of over 50%. The guideline of NICE received the highest score of 89.3%±5.7%.



1  
2  
3 For the inter-rater reliability analysis, the intraclass correlation coefficients for the six  
4 domains were calculated to assess the reliability of the scores between investigators.  
5 Table 4 shows the intraclass correlation coefficients, 95% confidence intervals and P  
6 values for each domain between four evaluators. The intraclass correlation  
7 coefficients ranged from 0.818 to 0.995. The analysis of the reliability study was  
8 performed with Statistical Package for Social Sciences (SPSS).  
9  
10

## 11 **Clinical guideline recommendations**

### 12 **Approaches to risk factors and diagnostic strategies for neonatal** 13 **hyperbilirubinemia**

14  
15  
16 Nine guidelines covered risk factors of severe neonatal hyperbilirubinemia including  
17 maternal and neonatal risk factors. All guidance documents gave recommendations of  
18 diagnosis. Table 5 and 6 shows the main risk factors and some diagnostic strategies of  
19 neonatal jaundice. Guidelines differed somewhat in their report of risk factors of  
20 severe neonatal jaundice. Regarding the neonatal risk factors, nearly all guidelines  
21 reported prematurity, exclusive breastfeeding, G6PD deficiency. Cephalohematoma  
22 or bruises, male were defined as risk factors in some guidelines, while NICE<sup>16</sup> stated  
23 that the evidence was inconclusive and results from most studies show no statistically  
24 significant association between these factors and hyperbilirubinemia.  
25  
26  
27  
28

29  
30 Visual assessment was recommended as a first step of diagnostic strategy by most  
31 organization and the guideline of Malaysia<sup>15</sup> specifically mentioned that Kramer's  
32 rule could be widely practiced. All guidelines advocated TSB measurement was the  
33 gold standard for detecting and determining the level of hyperbilirubinemia.  
34 Non-invasive method like transcutaneous bilirubinometer was introduced and gained  
35 acceptance by all guidelines. Other method for detecting like icterometer were not  
36 recommended by NICE<sup>16</sup> and MaHTAS<sup>15</sup> because there was no good quality evidence  
37 to indicate its reliability. In addition, nearly all guidelines recommended additional  
38 laboratory tests for babies with prolonged jaundice that could be of value to evaluate  
39 and identify the underlying disease. These tests included complete blood count, blood  
40 group compatibility, direct antiglobulin test (DAT), septic workup, urinalysis, urine  
41 culture, thyroid functions, G6PD, reticulocyte count and conjugated component of  
42 bilirubin.  
43  
44  
45  
46  
47

### 48 **Approaches to treatment for neonatal hyperbilirubinemia**

49 Table 7 showed the recommendations of the management for neonatal jaundice. The  
50 key areas included the initiating threshold and details of different kinds of therapies  
51 and care of babies during therapy. Guidelines distinguished treatment scenarios based  
52 on the level of hyperbilirubinemia including phototherapy, exchange transfusion and  
53 pharmacotherapy.  
54  
55

56 All guidelines discussed the threshold of phototherapy and exchange transfusion, and  
57 most of the organizations divided patients into groups according to gestational age  
58 and risk factors. As an example, we reported the detailed initiating TSB level for  
59  
60

1  
2  
3 full-term neonates with and without risk factors in the table, finding that there were  
4 little differences between guidelines. The majority of the guidelines proposed a  
5 number of general cares during phototherapy such as temperature measurement, eye  
6 protection and continued breastfeeding. For other forms of phototherapy, home  
7 phototherapy was recommended by AAP<sup>10</sup> and MaHTAS<sup>15</sup> while sunlight exposure  
8 was not supported by four organizations (AAP, NICE, QCG, SAP). Moreover, seven  
9 guidelines mentioned the complications of phototherapy.  
10  
11  
12

13  
14 For initiating exchange transfusion, the threshold was higher than phototherapy in all  
15 risk groups. Potential signs of acute bilirubin encephalopathy were important  
16 conditions in all guidelines. Most guidelines reported the details in performing  
17 exchange transfusion like blood product and blood volume. Double-volume exchange  
18 transfusion was advocated by majority. Furthermore, observations during exchange  
19 transfusion including heart rate, blood pressure, respiratory rate, oxygen saturation,  
20 skin temperature were only proposed by three organizations (MaHTAS<sup>15</sup>, ChPS<sup>12</sup> and  
21 ISN<sup>14</sup>). After exchange transfusion, seven guidelines recommended maintaining  
22 intensive phototherapy and six suggested monitoring TSB at varied time points.  
23 Besides, pharmacotherapy was also mentioned by ten guidelines. However, the  
24 recommendation of medication varied greatly.  
25  
26  
27  
28

## 29 Discussion

30 Our systematic review appraised 12 clinical practice guidelines for diagnosis and  
31 management of neonatal hyperbilirubinemia. The quality of the guidelines was highly  
32 variable, particularly in certain domains. The included guidelines received the highest  
33 scores in clarity of presentation and lowest scores for rigor of development. Evaluated  
34 by the AGREE II instrument, most guidelines indicated good clarity regarding their  
35 objective, clinical questions and scope. As the AGREE II mentioned in stakeholder  
36 involvement domain, many guideline development groups represented a variety of  
37 relevant professional areas<sup>9</sup>. Also, it was valuable to explore the views of the target  
38 population, or their parents for neonates with jaundice. However, even some  
39 guidelines targeted their users as healthcare providers and parents, almost all  
40 development groups ignored the preferences of parents of the jaundice neonates.  
41  
42  
43  
44  
45

46 In terms of the “Rigor of Development” domain, which was considered as the  
47 indicator of quality of all the domains<sup>22</sup>, varied a lot among different guidelines.  
48 Guidelines with low scores in this domain were usually because of poor report in  
49 systematic methods for searching evidence and formulating recommendations, lack of  
50 external review and updating mechanisms. Some guidelines like NICE<sup>16</sup>, for example,  
51 provided detailed search strategy, evidence table and reasons for excluded studies to  
52 prove their systematic methods, while some guidelines did not give complete  
53 information about methods of searching and selecting evidence. The clarity of  
54 presentation of the recommendations was specific and unambiguous in most  
55 guidelines appraised.  
56  
57  
58  
59  
60

1  
2  
3 The scores of applicability domain played a significant role reflecting the  
4 implementation of guidelines. Additional materials including summary documents  
5 and educational tools could be beneficial. However, more than half of included  
6 guidelines did not discuss facilitators and barriers to their application or tools for  
7 practicing, so they might have a limitation of effect<sup>23</sup>. Therefore, future guideline  
8 developers should consider more about the potential resource implications and  
9 facilitators to application especially for guidelines published for developing regions.  
10 Regarding the editorial independence domain, the views of the funding body and  
11 interests of the developers should be reported as part of standard practice of  
12 guidelines development.  
13  
14  
15  
16

17  
18 In this study, we also summarized and compared the specific recommendations of  
19 diagnosis and treatment of neonatal hyperbilirubinemia. All guidelines covered the  
20 threshold of phototherapy and exchange transfusion, while most of the guidelines  
21 stated that the threshold graph was reproduced and adapted with permission from  
22 guideline of AAP<sup>10</sup>. However, AAP noted that the suggested levels represented a  
23 consensus of most of the committee but were based on limited evidence, and the  
24 levels shown were approximations<sup>10</sup>. Therefore, more qualified studies of different  
25 populations were needed to standardize treatment methods. In terms of  
26 pharmacotherapy, the variations of different guidelines also existed. The discrepancy  
27 was mainly because of varying qualities of evidence, limitation of studies  
28 generalization and unapproved by national administration.  
29  
30  
31  
32

33 To our knowledge, our study proposed the first systematic critical appraisal of  
34 guidelines with diagnostic and treatment recommendations targeted to neonates with  
35 jaundice. The strengths of our review included the integration of comprehensive  
36 search strategies, the validated AGREE II instrument used and four independent  
37 reviewers to minimize subjective bias. Additionally, not only guidelines written in  
38 English were included, but also a Chinese-language guideline by Chinese Pediatric  
39 society were appraised in our study. As a representative of developing country, the  
40 inclusion of Chinese-language guideline may minimize the overestimation of the  
41 quality of guidelines to some degree.  
42  
43  
44  
45

46 However, there were several possible limitations in our study. First, guidelines written  
47 entirely in other languages except for English and Chinese might have been  
48 overlooked. The data showed that the disease burden was greatest in sub-Saharan  
49 Africa and south Asia<sup>2</sup>, while the guidelines from these areas were not found. Second,  
50 the AGREE-II was an instrument used to evaluate guidelines with less attention to  
51 detailed recommendations. Although it had said that a global appraisal on a  
52 guideline's developing process may reflect the strength of recommendations<sup>24</sup>, the  
53 quality of specific recommendations had direct influence on practice. Finally, we only  
54 assessed guidelines through reported literature without other ways like contacting  
55 guidelines developers to get additional clarification. This may underestimate the  
56 systematic methods of the guideline development by organizations.  
57  
58  
59  
60

## Conclusion

In general, our study evaluated the quality of methodologies and rigorous strategies in the guideline development process and summarized the recommendations on diagnosis and treatment of neonatal hyperbilirubinemia. The results revealed that current guidelines varied in quality of developing process and inconsistent existed in recommendations despite some similarities. Therefore, future guidelines should pay more attention to the quality of methodologies in the guideline development process and more qualified evidence were needed to standardize the initiating threshold of treatment for neonatal hyperbilirubinemia.

For peer review only

## References:

1. Bhutani VK, Stark AR, Lazzeroni LC, et al. Predischarge screening for severe neonatal hyperbilirubinemia identifies infants who need phototherapy. *J Pediatr* 2013;162(3):477-82 e1. doi: 10.1016/j.jpeds.2012.08.022.
2. Olusanya BO, Kaplan M, Hansen TWR. Neonatal hyperbilirubinaemia: a global perspective. *Lancet Child Adolesc Health* 2018;2(8):610-20. doi: 10.1016/S2352-4642(18)30139-1.
3. Olusanya BO, Teeple S, Kassebaum NJ. The Contribution of Neonatal Jaundice to Global Child Mortality: Findings From the GBD 2016 Study. *Pediatrics* 2018;141(2) doi: 10.1542/peds.2017-1471.
4. Shaneyfelt TM, Mayo-Smith MF, Rothwangl J. Are guidelines following guidelines? The methodological quality of clinical practice guidelines in the peer-reviewed medical literature. *Jama* 1999;281(20):1900-5. doi: 10.1001/jama.281.20.1900.
5. Li Q, Li X, Kwong JS, et al. Diagnosis and treatment for hyperuricaemia and gout: a protocol for a systematic review of clinical practice guidelines and consensus statements. *BMJ Open* 2017;7(6):e014928. doi: 10.1136/bmjopen-2016-014928.
6. Nagler EV, Vanmassenhove J, van der Veer SN, et al. Diagnosis and treatment of hyponatremia: a systematic review of clinical practice guidelines and consensus statements. *BMC Med* 2014;12:1. doi: 10.1186/s12916-014-0231-1.
7. Brouwers MC, Kho ME, Browman GP, et al. AGREE II: advancing guideline development, reporting and evaluation in health care. *CMAJ : Canadian Medical Association journal = journal de l'Association medicale canadienne* 2010;182(18):E839-42. doi:

- 1  
2  
3  
4 10.1503/cmaj.090449.  
5  
6  
7 8. Tong A, Chapman JR, Wong G, et al. Screening and follow-up of living kidney donors: a  
8  
9 systematic review of clinical practice guidelines. *Transplantation* 2011;92(9):962-72.  
10  
11 doi: 10.1097/TP.0b013e3182328276.  
12  
13  
14 9. AGREE II training tools. Available at:  
15  
16 <http://www.agreetrust.org/resource-centre/agree-ii-training-tools/>.  
17  
18  
19 10. American Academy of Pediatrics Subcommittee on H. Management of hyperbilirubinemia  
20  
21 in the newborn infant 35 or more weeks of gestation. *Pediatrics* 2004;114(1):297-316.  
22  
23 doi: 10.1542/peds.114.1.297.  
24  
25  
26  
27 11. Guidelines for detection, management and prevention of hyperbilirubinemia in term and  
28  
29 late preterm newborn infants (35 or more weeks' gestation) - Summary. *Paediatrics &*  
30  
31 *child health* 2007;12(5):401-18. doi: 10.1093/pch/12.5.401.  
32  
33  
34  
35 12. [Experts consensus on principles for diagnosis and treatment of neonatal jaundice].  
36  
37 *Zhonghua er ke za zhi = Chinese journal of pediatrics* 2010;48(9):685-6.  
38  
39  
40 13. Kaplan M, Merlob P, Regev R. Israel guidelines for the management of neonatal  
41  
42 hyperbilirubinemia and prevention of kernicterus. *J Perinatol* 2008;28(6):389-97. doi:  
43  
44 10.1038/jp.2008.20.  
45  
46  
47  
48 14. Romagnoli C, Barone G, Pratesi S, et al. Italian guidelines for management and treatment  
49  
50 of hyperbilirubinaemia of newborn infants  $\geq$  35 weeks' gestational age. *Ital J Pediatr*  
51  
52 2014;40(1):11. doi: 10.1186/1824-7288-40-11.  
53  
54  
55  
56 15. Section MHTA. Management of neonatal jaundice. Available at: <http://www.moh.gov.my>  
57  
58 2014.  
59  
60

- 1  
2  
3  
4 16. Amos RC, Jacob H, Leith W. Jaundice in newborn babies under 28 days: NICE guideline  
5  
6 2016 (CG98). *Arch Dis Child Educ Pract Ed* 2017;102(4):207-09. doi:  
7  
8 10.1136/archdischild-2016-311556.  
9  
10  
11  
12 17. Bratlid D, Nakstad B, Hansen TW. National guidelines for treatment of jaundice in the  
13  
14 newborn. *Acta paediatrica (Oslo, Norway : 1992)* 2011;100(4):499-505. doi:  
15  
16 10.1111/j.1651-2227.2010.02104.x.  
17  
18  
19  
20 18. Guidelines QC. Neonatal jaundice. Available at: [www.healthqld.gov.au/qcg](http://www.healthqld.gov.au/qcg) 2019.  
21  
22  
23 19. Sanchez-Redondo Sanchez-Gabriel MD, Leante Castellanos JL, Benavente Fernandez I,  
24  
25 et al. [Guidelines for prevention, detection and management of hyperbilirubinaemia in  
26  
27 newborns of 35 or more weeks of gestation]. *An Pediatr (Barc)* 2017;87(5):294 e1-94  
28  
29 e8. doi: 10.1016/j.anpedi.2017.03.006.  
30  
31  
32  
33 20. R. Arlettaz AB, L. Buetti, H. Fahnenstich, D. Mieth, M. Roth-Kleiner. Assessment and  
34  
35 Treatment of Jaundiced Newborn Infants 35 0/ 7 or more Weeks of Gestation.  
36  
37 Available at: <https://www.neonetch/recommendations/authored-ssn> 2007.  
38  
39  
40  
41 21. Coban A, Turkmen MK, Gursoy T. Turkish Neonatal Society guideline to the approach,  
42  
43 follow-up, and treatment of neonatal jaundice. *Turk Pediatri Ars* 2018;53(Suppl  
44  
45 1):S172-S79. doi: 10.5152/TurkPediatriArs.2018.01816.  
46  
47  
48  
49 22. Deng Y, Luo L, Hu Y, et al. Clinical practice guidelines for the management of neuropathic  
50  
51 pain: a systematic review. *BMC Anesthesiol* 2016;16:12. doi:  
52  
53 10.1186/s12871-015-0150-5.  
54  
55  
56 23. Sabharwal S, Patel NK, Gauher S, et al. High methodologic quality but poor applicability:  
57  
58 assessment of the AAOS guidelines using the AGREE II instrument. *Clin Orthop*  
59  
60

1  
2  
3  
4 *Relat Res* 2014;472(6):1982-8. doi: 10.1007/s11999-014-3530-0.  
5

- 6  
7 24. Huang TW, Lai JH, Wu MY, et al. Systematic review of clinical practice guidelines in the  
8  
9 diagnosis and management of thyroid nodules and cancer. *BMC Med* 2013;11:191.  
10  
11 doi: 10.1186/1741-7015-11-191.  
12  
13  
14

### 15 **Author Statement**

16 Dr Zhang conceptualized and designed the study, screened the titles and abstracts of  
17 searched citations, extracted general characteristics and descriptive data from  
18 guideline recommendations, assessed the selected guidelines using the AGREE-II  
19 instrument and drafted the initial manuscript.

20  
21 Dr He screened the titles and abstracts of searched citations, extracted general  
22 characteristics and descriptive data from guideline recommendations, assessed the  
23 selected guidelines using the AGREE-II instrument and revised the manuscript.

24  
25 Dr Wenxing Li and Dr Chen assessed the selected guidelines using the AGREE-II  
26 instrument, reviewed and revised the manuscript.

27  
28 Prof Tang conceptualized and designed the study, coordinated and supervised  
29 guideline assessment, and critically reviewed the manuscript for important intellectual  
30 content.

31  
32 Dr Xiong and Prof Youping Li coordinated and supervised guideline assessment, and  
33 critically reviewed the manuscript for important intellectual content.

34  
35 All authors approved the final manuscript as submitted and agree to be accountable  
36 for all aspects of the work.  
37  
38  
39  
40  
41  
42  
43  
44  
45  
46  
47  
48  
49  
50  
51  
52  
53  
54  
55  
56  
57  
58  
59  
60



1  
2  
3 **Legends:**  
4

5  
6 **Figure 1. Study selection diagram**  
7

8 **Table 1. General characteristics of included guidelines**

9 **Table 2. General characteristics of included guidelines**

10  
11 **Table 3. Domain scores (%) of the nine guidelines assessed by using the**  
12 **AGREE-II instrument**

13 **Table 4. Inter rater reliability study results**

14 **Table 5. Summary of risk factors of severe neonatal jaundice**

15 **Table 6. Summary of recommendations for approaches to diagnosis of neonatal**  
16 **hyperbilirubinemia**

17 **Table 7. Summary of recommendations for approaches to treatment of neonatal**  
18 **hyperbilirubinemia**  
19  
20  
21  
22  
23  
24  
25  
26  
27  
28  
29  
30  
31  
32  
33  
34  
35  
36  
37  
38  
39  
40  
41  
42  
43  
44  
45  
46  
47  
48  
49  
50  
51  
52  
53  
54  
55  
56  
57  
58  
59  
60

Table 1 General characteristics

| Guidelines | Organization (country)                                                      | Last update year<br>(update times) | Target population                            |                                                     | Target users                                      |
|------------|-----------------------------------------------------------------------------|------------------------------------|----------------------------------------------|-----------------------------------------------------|---------------------------------------------------|
|            |                                                                             |                                    | Inclusion criteria                           | Exclusion criteria                                  |                                                   |
| QCG        | Queensland Clinical Guidelines (Australia)                                  | 2019 (7)                           | All preterm and term babies                  | Conjugated hyperbilirubinaemia, surgical management | Parents and carers                                |
| CPS        | Canadian Pediatric Society, Fetus and Newborn Committee (Canada)            | 2018 (1)                           | Newborn Infants $\geq$ 35 Weeks of Gestation | Not reported                                        | Not reported                                      |
| TPA        | Turkish Pediatric Association (Turkey)                                      | 2018 (0)                           | All preterm and term babies                  | Not reported                                        | Pediatricians and family physicians               |
| SAP        | Spanish Association of Pediatrics (Spain)                                   | 2017 (0)                           | All preterm and term babies                  | Not reported                                        | Not reported                                      |
| NICE       | National Institute for Health and Care Excellence (the United Kingdom)      | 2016 (1)                           | All preterm and term babies                  | Conjugated hyperbilirubinaemia, surgical management | Healthcare professionals, families and carers     |
| ChPS       | Chinese Pediatric Society, Chinese Medical Association (China)              | 2014 (1)                           | All preterm and term babies                  | Not reported                                        | Not reported                                      |
| ISN        | Italian Society of Neonatology (Italy)                                      | 2014 (0)                           | Newborn Infants $\geq$ 35 Weeks of Gestation | Not reported                                        | Neonatologists and family pediatricians           |
| MaHTAS     | Malaysia Health Technology Assessment Section (Malaysia)                    | 2014 (1)                           | All preterm and term babies                  | Conjugated hyperbilirubinaemia, prolonged jaundice  | Pediatricians and pharmacists, parents and carers |
| NPA        | Norwegian Pediatric Association (Norway)                                    | 2010 (0)                           | All preterm and term babies                  | Not reported                                        | Healthcare personnel                              |
| AAP        | American Academy of Pediatrics Subcommittee on Hyperbilirubinemia (America) | 2009 (1)                           | Newborn Infants $\geq$ 35 Weeks of Gestation | Not reported                                        | Healthcare personnel                              |
| INS        | Israel Neonatal Society (Israel)                                            | 2008 (0)                           | All preterm and term babies                  | Not reported                                        | Neonatologists, pediatricians and family doctors  |
| SSN        | Swiss Society of Neonatology (Swiss)                                        | 2007 (2)                           | Newborn Infants $\geq$ 35 Weeks of Gestation | Not reported                                        | Not reported                                      |

QCG: Queensland Clinical Guidelines (Australia); CPS: Canadian Pediatric Society, Fetus and Newborn Committee (Canada); TPA: Turkish Pediatric Association (Turkey); SAP: Spanish Association of Pediatrics (Spain); NICE: National Institute for Health and Care Excellence (the United Kingdom); ChPS: Chinese Pediatric Society, Chinese Medical Association (China); ISN: Italian Society of Neonatology (Italy); MaHTAS: Malaysia Health Technology

1  
2  
3  
4  
5  
6  
7  
8  
9  
10  
11  
12  
13  
14  
15  
16  
17  
18  
19  
20  
21  
22  
23  
24  
25  
26  
27  
28  
29  
30  
31  
32  
33  
34  
35  
36  
37  
38  
39  
40  
41  
42  
43  
44  
45  
46

Assessment Section (Malaysia); NPA: Norwegian Pediatric Association (Norway); AAP: American Academy of Pediatrics Subcommittee on Hyperbilirubinemia (America); INS: Israel Neonatal Society (Israel); SSN: Swiss Society of Neonatology (Swiss).

For peer review only

Table 2 General characteristics

| Guidelines | identification of evidence                                                             |              |              |                          |                              | guideline review process | Fundings                                          |
|------------|----------------------------------------------------------------------------------------|--------------|--------------|--------------------------|------------------------------|--------------------------|---------------------------------------------------|
|            | database                                                                               | search terms | dates        | detailed search strategy | inclusion/exclusion criteria |                          |                                                   |
| QCG        | PubMed, CINAHL, Medline, Cochrane Central Register of Controlled Trials, EBSCO, Embase | Reported     | After 2004   | Not reported             | Not reported                 | Not reported             | Healthcare Improvement Unit, Queensland Health    |
| CPS        | MEDLINE, the Cochrane library                                                          | Reported     | Before 2007  | Not reported             | Not reported                 | Reported                 | Not reported                                      |
| TPA        | Not reported                                                                           | Not reported | Not reported | Not reported             | Not reported                 | Not reported             | No financial support                              |
| SAP        | PubMed                                                                                 | Reported     | Not reported | Not reported             | Not reported                 | Not reported             | Not reported                                      |
| NICE       | Medline, EBM Reviews, CDSR, DARE, Embase, CINAHL                                       | Reported     | Before 2008  | Reported                 | Not reported                 | Not reported             | National Institute for Health and Care Excellence |
| ChPS       | Not reported                                                                           | Not reported | Not reported | Not reported             | Not reported                 | Not reported             | Not reported                                      |
| ISN        | Guidelines from other countries, Studies in Italy                                      | Not reported | Before 2013  | Not reported             | Not reported                 | Not reported             | Not reported                                      |
| MaHTAS     | GIN, Medline, Pubmed, CDSR                                                             | Reported     | After 2001   | Reported                 | Reported                     | External review          | Ministry of Health Malaysia                       |
| NPA        | Not reported                                                                           | Not reported | Not reported | Not reported             | Not reported                 | Not reported             | Not reported                                      |
| AAP        | Not reported                                                                           | Not reported | Not reported | Not reported             | Not reported                 | Peer review              | Not reported                                      |
| INS        | Not reported                                                                           | Not reported | Not reported | Not reported             | Not reported                 | Not reported             | Not reported                                      |
| SSN        | Not reported                                                                           | Not reported | Not reported | Not reported             | Not reported                 | Not reported             | Not reported                                      |

QCG: Queensland Clinical Guidelines (Australia); CPS: Canadian Pediatric Society, Fetus and Newborn Committee (Canada); TPA: Turkish Pediatric Association (Turkey); SAP: Spanish Association of Pediatrics (Spain); NICE: National Institute for Health and Care Excellence (the United Kingdom); ChPS: Chinese Pediatric Society, Chinese Medical Association (China); ISN: Italian Society of Neonatology (Italy); MaHTAS: Malaysia Health Technology Assessment Section (Malaysia); NPA: Norwegian Pediatric Association (Norway); AAP: American Academy of Pediatrics Subcommittee on Hyperbilirubinemia (America); INS: Israel Neonatal Society (Israel); SSN: Swiss Society of Neonatology (Swiss).

1  
2  
3  
4  
5  
6  
7  
8  
9  
10  
11  
12  
13  
14  
15  
16  
17  
18  
19  
20  
21  
22  
23  
24  
25  
26  
27  
28  
29  
30  
31  
32  
33  
34  
35  
36  
37  
38  
39  
40  
41  
42  
43  
44  
45  
46

**Table 3 Domain scores (%) of the nine guidelines assessed by using the AGREE-II instrument (%)**

|                 | NICE     | MaHTAS  | QCG       | ISN       | AAP       | TPA       | NPA       | INS       | SAP       | SSN       | CPS       | ChPS      | mean±SD   |
|-----------------|----------|---------|-----------|-----------|-----------|-----------|-----------|-----------|-----------|-----------|-----------|-----------|-----------|
| <b>Domain 1</b> | 91.7     | 98.6    | 91.7      | 90.3      | 97.2      | 84.7      | 86.1      | 87.5      | 73.6      | 90.3      | 91.7      | 81.9      | 88.8±6.5  |
| <b>Domain 2</b> | 93.1     | 61.1    | 66.7      | 61.1      | 51.4      | 44.4      | 50.0      | 56.9      | 18.1      | 36.1      | 22.2      | 9.7       | 47.6±22.4 |
| <b>Domain 3</b> | 85.9     | 62.5    | 51.0      | 17.2      | 40.6      | 9.9       | 19.8      | 18.2      | 28.1      | 17.2      | 22.4      | 10.4      | 31.9±22.6 |
| <b>Domain 4</b> | 98.6     | 98.6    | 98.6      | 94.4      | 94.4      | 87.5      | 80.6      | 83.3      | 91.7      | 88.9      | 94.4      | 88.9      | 91.7±5.7  |
| <b>Domain 5</b> | 85.4     | 64.6    | 61.5      | 26.0      | 38.5      | 25.0      | 57.3      | 37.5      | 24.0      | 39.6      | 29.2      | 27.1      | 43.0±18.9 |
| <b>Domain 6</b> | 81.3     | 89.6    | 31.3      | 64.6      | 25.0      | 93.8      | 0.0       | 4.2       | 52.1      | 0.0       | 0.0       | 0.0       | 36.8±36.1 |
| <b>mean±SD</b>  | 89.3±5.7 | 79%±17% | 66.8±23.0 | 58.9±29.2 | 57.9±27.9 | 57.6±32.8 | 49.0±30.8 | 47.9±31.1 | 47.9±27.2 | 45.3±33.9 | 43.3±36.3 | 36.3±35.7 |           |

Domain 1: scope and purpose; Domain 2: stakeholder involvement; Domain 3: rigor of development; Domain 4: clarity of presentation; Domain 5: applicability; Domain 6: editorial independence.

NICE: National Institute for Health and Care Excellence (the United Kingdom); MaHTAS: Malaysia Health Technology Assessment Section (Malaysia); QCG: Queensland Clinical Guidelines (Australia); INS: Israel Neonatal Society (Israel); AAP: American Academy of Pediatrics Subcommittee on Hyperbilirubinemia (America); TPA: Turkish Pediatric Association (Turkey); NPA: Norwegian Pediatric Association (Norway); ISN: Italian Society of Neonatology (Italy); SAP: Spanish Association of Pediatrics (Spain); SSN: Swiss Society of Neonatology (Swiss); CPS: Canadian Pediatric Society, Fetus and Newborn Committee (Canada); ChPS: Chinese Pediatric Society, Chinese Medical Association (China).

**Table 4 Inter rater reliability study results**

|                 | ICC   | n  | k | Lower 95% CI | Upper 95% CI | P value |
|-----------------|-------|----|---|--------------|--------------|---------|
| <b>Domain 1</b> | 0.863 | 12 | 4 | 0.670        | 0.956        | 0.000   |
| <b>Domain 2</b> | 0.989 | 12 | 4 | 0.974        | 0.997        | 0.000   |
| <b>Domain 3</b> | 0.994 | 12 | 4 | 0.986        | 0.998        | 0.000   |
| <b>Domain 4</b> | 0.818 | 12 | 4 | 0.561        | 0.941        | 0.000   |
| <b>Domain 5</b> | 0.995 | 12 | 4 | 0.988        | 0.998        | 0.000   |
| <b>Domain 6</b> | 0.993 | 12 | 4 | 0.984        | 0.998        | 0.000   |

Domain 1: scope and purpose; Domain 2: stakeholder involvement; Domain 3: rigor of development; Domain 4: clarity of presentation; Domain 5: applicability; Domain 6: editorial independence.

Table 5 Summary of risk factors of severe neonatal jaundice

|                                               | NICE | MaHTAS | QCG | INS | AAP | TPA | NPA | ISN | SAP | SSN | CPS | ChPS |
|-----------------------------------------------|------|--------|-----|-----|-----|-----|-----|-----|-----|-----|-----|------|
| <b>Maternal</b>                               |      |        |     |     |     |     |     |     |     |     |     |      |
| <b>Blood group O</b>                          | NA   | +      | +   | +   | +   | NA  | NA  | NA  | NA  | NA  | +   | NA   |
| <b>Rhesus negative</b>                        | NA   | +      | +   | +   | +   | NA  | NA  | NA  | NA  | NA  | +   | NA   |
| <b>Diabetes</b>                               | NA   | +      | +   | NA  | +   | NA   |
| <b>Neonatal</b>                               |      |        |     |     |     |     |     |     |     |     |     |      |
| <b>G6PD deficiency</b>                        | NA   | +      | +   | +   | +   | +   | NA  | NA  | +   | NA  | +   | +    |
| <b>Prematurity</b>                            | +    | +      | +   | NA  | +   | +   | NA  | NA  | +   | NA  | +   | +    |
| <b>Exclusive breastfeeding</b>                | +    | +      | +   | NA  | +   | NA  | NA  | NA  | +   | NA  | +   | +    |
| <b>Cephalhaematoma or bruises</b>             | -    | +      | +   | NA  | +   | NA  | NA  | NA  | +   | NA  | +   | +    |
| <b>Sepsis</b>                                 | NA   | +      | +   | NA  | +   | +   | NA  | NA  | +   | NA  | -   | +    |
| <b>Sibling with severe hyperbilirubinemia</b> | +    | +      | +   | NA  | +   | NA  | NA  | NA  | NA  | NA  | +   | NA   |
| <b>Visible jaundice at younger than 24 h</b>  | +    | +      | NA  | +   | +   | NA  | NA  | NA  | NA  | NA  | +   | NA   |
| <b>Male</b>                                   | -    | NA     | +   | NA  | +   | NA  | NA  | NA  | NA  | NA  | +   | NA   |

NA: not available

NICE: National Institute for Health and Care Excellence (the United Kingdom); MaHTAS: Malaysia Health Technology Assessment Section (Malaysia); QCG: Queensland Clinical Guidelines (Australia); INS: Israel Neonatal Society (Israel); AAP: American Academy of Pediatrics Subcommittee on Hyperbilirubinemia (America); TPA: Turkish Pediatric Association (Turkey); NPA: Norwegian Pediatric Association (Norway); ISN: Italian Society of Neonatology (Italy); SAP: Spanish Association of Pediatrics (Spain); SSN: Swiss Society of Neonatology (Swiss); CPS: Canadian Pediatric Society, Fetus and Newborn Committee (Canada); ChPS: Chinese Pediatric Society, Chinese Medical Association (China).

Table 6 Summary of recommendations for approaches to diagnosis of neonatal hyperbilirubinemia

|                                             | NICE | MaHTAS | QCG | ISN | AAP | TPA | NPA | INS | SAP | SSN | CPS | ChPS |
|---------------------------------------------|------|--------|-----|-----|-----|-----|-----|-----|-----|-----|-----|------|
| <b>Clinical assessment</b>                  |      |        |     |     |     |     |     |     |     |     |     |      |
| Visual assessment (do not rely on it alone) | +    | +      | +   | NA  | +   | +   | NA  | NA  | +   | +   | NA  | NA   |
| <b>Measurement of bilirubin</b>             |      |        |     |     |     |     |     |     |     |     |     |      |
| TCB transcutaneous bilirubinometer          | +    | +      | +   | +   | +   | +   | +   | +   | +   | +   | +   | +    |
| TSB                                         | +    | +      | +   | +   | +   | +   | +   | +   | +   | +   | +   | +    |
| B/A                                         | -    | -      | NA  | NA  | +   | NA  | NA  | NA  | NA  | NA  | NA  | +    |
| Ictrometer                                  | -    | -      | NA  | +    |
| <b>Test for prolonged jaundice</b>          |      |        |     |     |     |     |     |     |     |     |     |      |
| Blood group compatibility                   | +    | +      | +   | +   | +   | +   | NA  | +   | +   | +   | +   | NA   |
| Direct antiglobulin test (DAT)              | +    | +      | +   | +   | +   | +   | NA  | +   | +   | +   | +   | NA   |
| G6PD                                        | +    | +      | +   | +   | +   | +   | NA  | +   | +   | NA  | +   | NA   |
| Conjugated component of bilirubin           | +    | NA     | +   | NA  | +   | +   | NA  | +   | +   | +   | +   | NA   |
| Complete blood count                        | +    | +      | +   | +   | +   | +   | NA  | NA  | NA  | NA  | +   | NA   |
| Septic workup (if suspected)                | +    | +      | +   | NA  | +   | +   | NA  | NA  | +   | NA  | +   | NA   |
| Thyroid functions                           | NA   | NA     | +   | NA  | +   | +   | NA  | +   | +   | NA  | NA  | NA   |
| Urinalysis, urine culture                   | NA   | NA     | +   | NA  | +   | +   | NA  | +   | +   | NA  | NA  | NA   |
| Reticulocyte count                          | NA   | +      | +   | NA  | +   | +   | NA  | NA  | NA  | NA  | NA  | NA   |

NA: not available

NICE: National Institute for Health and Care Excellence (the United Kingdom); MaHTAS: Malaysia Health Technology Assessment Section (Malaysia); QCG: Queensland Clinical Guidelines (Australia); INS: Israel Neonatal Society (Israel); AAP: American Academy of Pediatrics Subcommittee on Hyperbilirubinemia (America); TPA: Turkish Pediatric Association (Turkey); NPA: Norwegian Pediatric Association (Norway); ISN: Italian Society of Neonatology (Italy); SAP: Spanish Association of Pediatrics (Spain); SSN: Swiss Society of Neonatology (Swiss); CPS: Canadian Pediatric Society, Fetus and Newborn Committee (Canada); ChPS: Chinese Pediatric Society, Chinese Medical Association (China).



Table 7 Summary of recommendations for approaches to treatment of neonatal hyperbilirubinemia

|                                                                                        | NICE              | MaHTAS    | QCG       | ISN       | AAP      | TPA       | NPA | INS      | SAP  | SSN | CPS | ChPS      |     |
|----------------------------------------------------------------------------------------|-------------------|-----------|-----------|-----------|----------|-----------|-----|----------|------|-----|-----|-----------|-----|
| <b>Phototherapy</b>                                                                    |                   |           |           |           |          |           |     |          |      |     |     |           |     |
| Conventional irradiance ( $\mu\text{W}/\text{cm}^2/\text{nm}$ )                        | NA                | >15       | 25-30     | NA        | NA       | 8-10      | NA  | NA       | 8-12 | NA  | NA  | 8-10      |     |
| Intensive irradiance ( $\mu\text{W}/\text{cm}^2/\text{nm}$ )                           | NA                | >30       | >30       | > 35      | >30      | 30-65     | >20 | >30      | >30  | NA  | >30 | >30       |     |
| Distance between light and baby (cm)                                                   | NA                | < 30 - 50 | 10–15     | NA        | About 10 | 35-40     | 20  | about 10 | 10   | NA  | 10  | NA        |     |
| Intensive phototherapy threshold for fullterm babies >96h ( $\mu\text{mol}/\text{L}$ ) | Well              | 350       | 359       | 359       | 343      | 359       | 359 | 359      | 359  | 359 | 350 | 359       | 359 |
|                                                                                        | With risk factors | NA        | 308       | 308       | NA       | 308       | 291 | 308      | 308  | 308 | 300 | 257       | 308 |
| Home phototherapy                                                                      | NA                | NA        | +         | NA        | +        | NA        | NA  | +        | NA   | NA  | NA  | NA        |     |
| Sunlight Exposure                                                                      | -                 | NA        | -         | NA        | -        | NA        | NA  | -        | -    | NA  | NA  | NA        |     |
| Complications                                                                          | +                 | NA        | +         | NA        | +        | +         | NA  | +        | NA   | NA  | +   | +         |     |
| <b>Exchange transfusion</b>                                                            |                   |           |           |           |          |           |     |          |      |     |     |           |     |
| Exchange transfusion threshold for fullterm babies >96h ( $\mu\text{mol}/\text{L}$ )   | Well              | 450       | 428       | 428       | 428      | 428       | 428 | 450      | 428  | 428 | 430 | 428       | 428 |
|                                                                                        | With risk factors | NA        | 393       | 393       | NA       | 376       | 393 | NA       | 376  | 376 | 370 | 325       | 376 |
| Detail observation during ET                                                           | NA                | +         | NA        | +         | NA       | NA        | NA  | NA       | NA   | NA  | NA  | +         |     |
| Maintain intensive PT after ET                                                         | +                 | +         | +         | +         | NA       | +         | NA  | NA       | NA   | NA  | +   | +         |     |
| Measure TSB after ET                                                                   | within 2h         | 4 – 6h    | within 2h | within 2h | NA       | within 2h | NA  | NA       | NA   | NA  | NA  | within 4h |     |
| Complications                                                                          | +                 | +         | +         | +         | +        | +         | NA  | +        | NA   | NA  | +   | NA        |     |
| <b>Pharmacotherapy</b>                                                                 |                   |           |           |           |          |           |     |          |      |     |     |           |     |
| Intravenous immunoglobulin                                                             | +                 | -         | -         | +         | +        | +         | NA  | +        | +    | NA  | +   | +         |     |
| Human albumin                                                                          | -                 | -         | -         | NA        | NA       | NA        | NA  | NA       | NA   | NA  | NA  | +         |     |
| Clofibrate                                                                             | -                 | -         | -         | NA        | NA       | NA        | NA  | NA       | NA   | NA  | NA  | NA        |     |
| Tin-mesoporphyrin                                                                      | NA                | -         | NA        | NA        | -        | NA        | NA  | NA       | NA   | NA  | +   | NA        |     |

1  
2  
3  
4  
5 NA: not available

6 NICE: National Institute for Health and Care Excellence (the United Kingdom); MaHTAS: Malaysia Health Technology Assessment Section (Malaysia); QCG: Queensland Clinical Guidelines (Australia); INS: Israel Neonatal  
7 Society (Israel); AAP: American Academy of Pediatrics Subcommittee on Hyperbilirubinemia (America); TPA: Turkish Pediatric Association (Turkey); NPA: Norwegian Pediatric Association (Norway); ISN: Italian Society of  
8 Neonatology (Italy); SAP: Spanish Association of Pediatrics (Spain); SSN: Swiss Society of Neonatology (Swiss); CPS: Canadian Pediatric Society, Fetus and Newborn Committee (Canada); ChPS: Chinese Pediatric Society,  
9 Chinese Medical Association (China).  
10  
11  
12  
13  
14  
15  
16  
17  
18  
19  
20  
21  
22  
23  
24  
25  
26  
27  
28  
29  
30  
31  
32  
33  
34  
35  
36  
37  
38  
39  
40  
41  
42  
43  
44  
45  
46

For peer review only

Figure 1 Study selection diagram

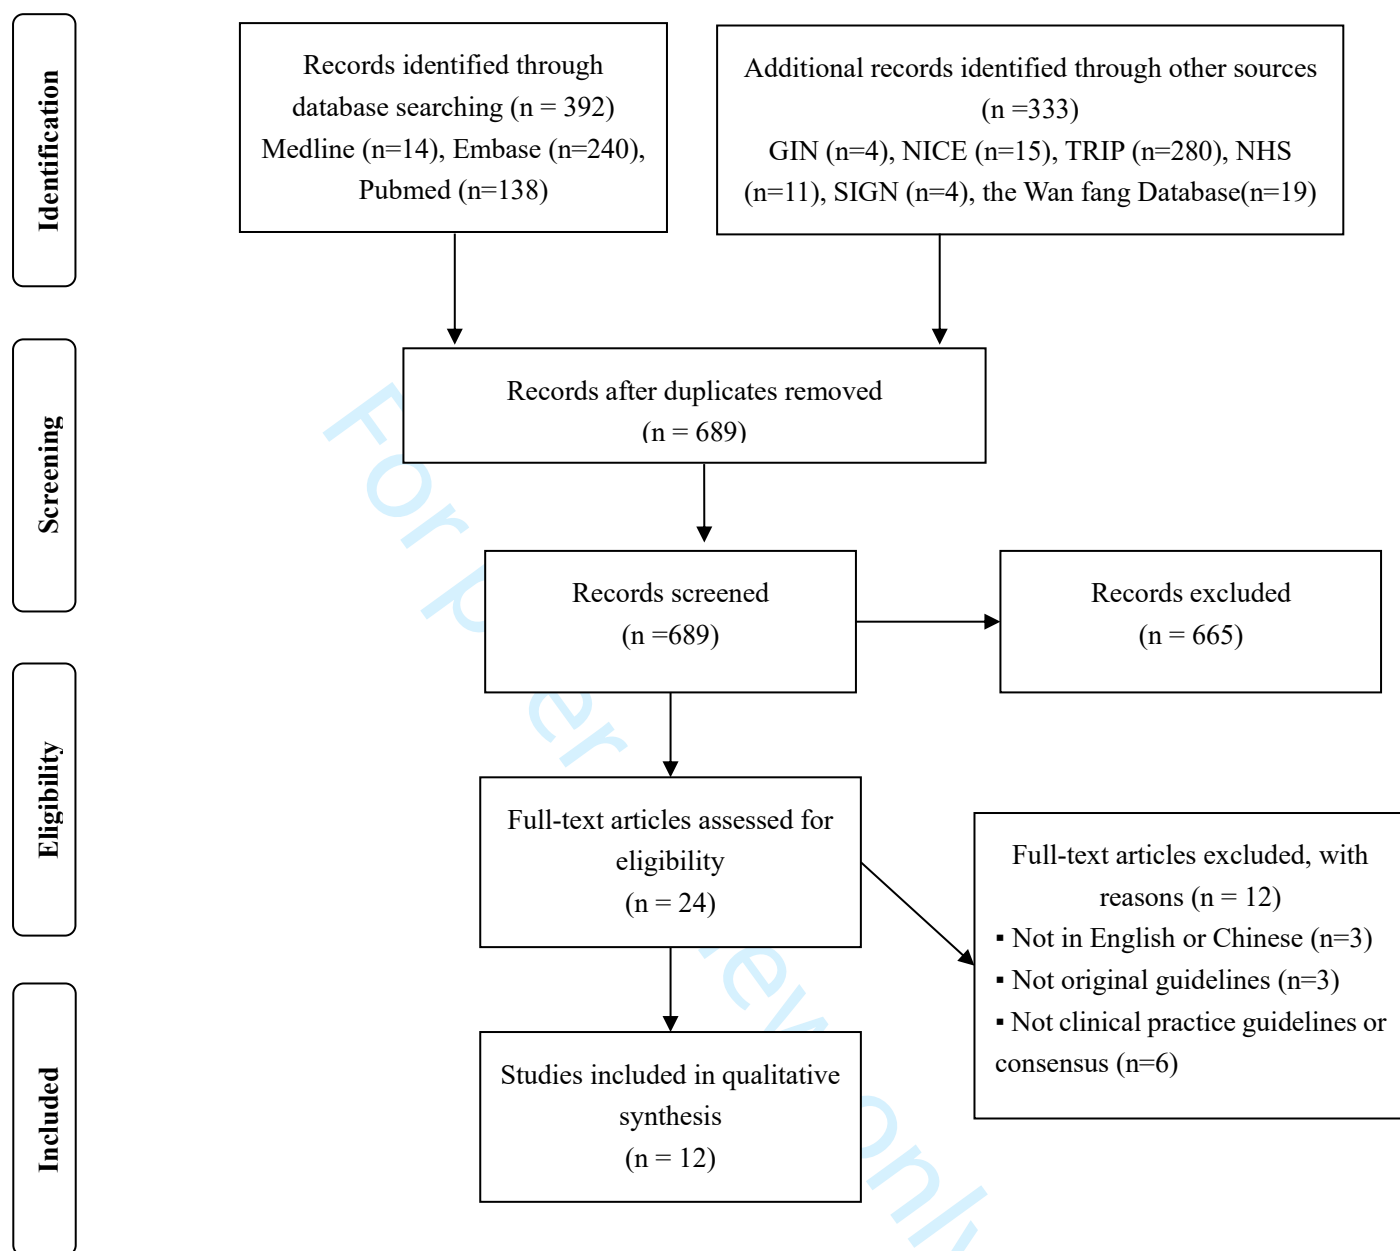

GIN: the Guidelines International Network, NICE: the National Institute for Health and Care Excellence, TRIP: the Turning Research Into Practice Database, NHS: the National Health Service Evidence, SIGN: the Scottish Intercollegiate Guidelines Network

## Searching strategy of PubMed

1  
2  
3  
4  
5  
6  
7 #1 Neonatal hyperbilirubinemia [Mesh] OR Neonatal Hyperbilirubinemia OR  
8  
9 Hyperbilirubinemia During Infancy OR During Infancies, Hyperbilirubinemia OR  
10  
11 Infancy, Hyperbilirubinemia During OR Indirect Hyperbilirubinemia, Neonatal OR  
12  
13 Hyperbilirubinemia, Neonatal Indirect OR Neonatal Indirect Hyperbilirubinemia OR  
14  
15 Direct Hyperbilirubinemia, Neonatal OR Hyperbilirubinemia, Neonatal Direct OR  
16  
17 Neonatal Direct Hyperbilirubinemia  
18  
19  
20  
21  
22 #2 Jaundice, Neonatal [Mesh] OR Neonatal Jaundice OR Physiological Neonatal  
23  
24 Jaundice OR Jaundice, Physiological Neonatal OR Neonatal Jaundice, Physiological  
25  
26 OR Severe Jaundice in Newborn OR Severe Jaundice in Neonate OR Icterus Gravis  
27  
28  
29  
30 Neonatorum  
31  
32  
33 #3 Clinical practice guidelines [Mesh]  
34  
35 #4 #1 OR #2  
36  
37  
38 #5 #3 AND #4  
39  
40  
41  
42  
43  
44  
45  
46  
47  
48  
49  
50  
51  
52  
53  
54  
55  
56  
57  
58  
59  
60

# Reporting checklist for systematic review and meta-analysis.

Based on the PRISMA guidelines.

## Instructions to authors

Complete this checklist by entering the page numbers from your manuscript where readers will find each of the items listed below.

Your article may not currently address all the items on the checklist. Please modify your text to include the missing information. If you are certain that an item does not apply, please write "n/a" and provide a short explanation.

Upload your completed checklist as an extra file when you submit to a journal.

In your methods section, say that you used the PRISMA reporting guidelines, and cite them as:

Moher D, Liberati A, Tetzlaff J, Altman DG, The PRISMA Group. Preferred Reporting Items for Systematic Reviews and Meta-Analyses: The PRISMA Statement

|                 | Reporting Item                                                                         | Page Number |
|-----------------|----------------------------------------------------------------------------------------|-------------|
| <b>Title</b>    |                                                                                        |             |
|                 | <a href="#">#1</a> Identify the report as a systematic review, meta-analysis, or both. | 1           |
| <b>Abstract</b> |                                                                                        |             |
| Structured      | <a href="#">#2</a> Provide a structured summary including, as applicable:              | 2           |

|    |                      |                    |                                                                 |     |
|----|----------------------|--------------------|-----------------------------------------------------------------|-----|
| 1  | summary              |                    | background; objectives; data sources; study eligibility         |     |
| 2  |                      |                    |                                                                 |     |
| 3  |                      |                    | criteria, participants, and interventions; study appraisal and  |     |
| 4  |                      |                    |                                                                 |     |
| 5  |                      |                    | synthesis methods; results; limitations; conclusions and        |     |
| 6  |                      |                    |                                                                 |     |
| 7  |                      |                    | implications of key findings; systematic review registration    |     |
| 8  |                      |                    |                                                                 |     |
| 9  |                      |                    | number                                                          |     |
| 10 |                      |                    |                                                                 |     |
| 11 |                      |                    |                                                                 |     |
| 12 | <b>Introduction</b>  |                    |                                                                 |     |
| 13 |                      |                    |                                                                 |     |
| 14 |                      |                    |                                                                 |     |
| 15 |                      |                    |                                                                 |     |
| 16 | Rationale            | <a href="#">#3</a> | Describe the rationale for the review in the context of what    | 3   |
| 17 |                      |                    | is already known.                                               |     |
| 18 |                      |                    |                                                                 |     |
| 19 |                      |                    |                                                                 |     |
| 20 |                      |                    |                                                                 |     |
| 21 | Objectives           | <a href="#">#4</a> | Provide an explicit statement of questions being addressed      | 3   |
| 22 |                      |                    | with reference to participants, interventions, comparisons,     |     |
| 23 |                      |                    | outcomes, and study design (PICOS).                             |     |
| 24 |                      |                    |                                                                 |     |
| 25 |                      |                    |                                                                 |     |
| 26 |                      |                    |                                                                 |     |
| 27 |                      |                    |                                                                 |     |
| 28 | <b>Methods</b>       |                    |                                                                 |     |
| 29 |                      |                    |                                                                 |     |
| 30 |                      |                    |                                                                 |     |
| 31 |                      |                    |                                                                 |     |
| 32 | Protocol and         | <a href="#">#5</a> | Indicate if a review protocol exists, if and where it can be    | NA  |
| 33 | registration         |                    | accessed (e.g., Web address) and, if available, provide         |     |
| 34 |                      |                    | registration information including the registration number.     |     |
| 35 |                      |                    |                                                                 |     |
| 36 |                      |                    |                                                                 |     |
| 37 |                      |                    |                                                                 |     |
| 38 |                      |                    |                                                                 |     |
| 39 | Eligibility criteria | <a href="#">#6</a> | Specify study characteristics (e.g., PICOS, length of follow-   | 3   |
| 40 |                      |                    | up) and report characteristics (e.g., years considered,         |     |
| 41 |                      |                    | language, publication status) used as criteria for eligibility, |     |
| 42 |                      |                    | giving rational                                                 |     |
| 43 |                      |                    |                                                                 |     |
| 44 |                      |                    |                                                                 |     |
| 45 |                      |                    |                                                                 |     |
| 46 |                      |                    |                                                                 |     |
| 47 |                      |                    |                                                                 |     |
| 48 |                      |                    |                                                                 |     |
| 49 | Information          | <a href="#">#7</a> | Describe all information sources in the search (e.g.,           | 3-4 |
| 50 | sources              |                    | databases with dates of coverage, contact with study            |     |
| 51 |                      |                    | authors to identify additional studies) and date last           |     |
| 52 |                      |                    | searched.                                                       |     |
| 53 |                      |                    |                                                                 |     |
| 54 |                      |                    |                                                                 |     |
| 55 |                      |                    |                                                                 |     |
| 56 |                      |                    |                                                                 |     |
| 57 |                      |                    |                                                                 |     |
| 58 |                      |                    |                                                                 |     |
| 59 |                      |                    |                                                                 |     |
| 60 |                      |                    |                                                                 |     |

|                                                              |                                    |                     |                                                                                                                                                                                                                                 |                            |
|--------------------------------------------------------------|------------------------------------|---------------------|---------------------------------------------------------------------------------------------------------------------------------------------------------------------------------------------------------------------------------|----------------------------|
| 1<br>2<br>3<br>4<br>5<br>6<br>7                              | Search                             | <a href="#">#8</a>  | Present full electronic search strategy for at least one database, including any limits used, such that it could be repeated.                                                                                                   | The supplementary material |
| 8<br>9<br>10<br>11<br>12<br>13<br>14<br>15<br>16<br>17<br>18 | Study selection                    | <a href="#">#9</a>  | State the process for selecting studies (i.e., for screening, for determining eligibility, for inclusion in the systematic review, and, if applicable, for inclusion in the meta-analysis).                                     | 3-4                        |
| 19<br>20<br>21<br>22<br>23<br>24<br>25<br>26<br>27<br>28     | Data collection process            | <a href="#">#10</a> | Describe the method of data extraction from reports (e.g., piloted forms, independently by two reviewers) and any processes for obtaining and confirming data from investigators.                                               | 4                          |
| 29<br>30<br>31<br>32<br>33<br>34<br>35                       | Data items                         | <a href="#">#11</a> | List and define all variables for which data were sought (e.g., PICOS, funding sources), and any assumptions and simplifications made.                                                                                          | 4                          |
| 36<br>37<br>38<br>39<br>40<br>41<br>42<br>43<br>44<br>45     | Risk of bias in individual studies | <a href="#">#12</a> | Describe methods used for assessing risk of bias in individual studies (including specification of whether this was done at the study or outcome level, or both), and how this information is to be used in any data synthesis. | NA                         |
| 46<br>47<br>48<br>49<br>50                                   | Summary measures                   | <a href="#">#13</a> | State the principal summary measures (e.g., risk ratio, difference in means).                                                                                                                                                   | 4                          |
| 51<br>52<br>53<br>54<br>55<br>56<br>57<br>58<br>59<br>60     | Planned methods of analysis        | <a href="#">#14</a> | Describe the methods of handling data and combining results of studies, if done, including measures of consistency (e.g., I <sup>2</sup> ) for each meta-analysis.                                                              | 4                          |

|    |                    |                     |                                                               |               |
|----|--------------------|---------------------|---------------------------------------------------------------|---------------|
| 1  | Risk of bias       | <a href="#">#15</a> | Specify any assessment of risk of bias that may affect the    | NA            |
| 2  |                    |                     |                                                               |               |
| 3  | across studies     |                     | cumulative evidence (e.g., publication bias, selective        |               |
| 4  |                    |                     | reporting within studies).                                    |               |
| 5  |                    |                     |                                                               |               |
| 6  |                    |                     |                                                               |               |
| 7  |                    |                     |                                                               |               |
| 8  |                    |                     |                                                               |               |
| 9  | Additional         | <a href="#">#16</a> | Describe methods of additional analyses (e.g., sensitivity    | 4             |
| 10 |                    |                     | or subgroup analyses, meta-regression), if done, indicating   |               |
| 11 | analyses           |                     | which were pre-specified.                                     |               |
| 12 |                    |                     |                                                               |               |
| 13 |                    |                     |                                                               |               |
| 14 |                    |                     |                                                               |               |
| 15 |                    |                     |                                                               |               |
| 16 | <b>Results</b>     |                     |                                                               |               |
| 17 |                    |                     |                                                               |               |
| 18 |                    |                     |                                                               |               |
| 19 | Study selection    | <a href="#">#17</a> | Give numbers of studies screened, assessed for eligibility,   | Figure 1      |
| 20 |                    |                     | and included in the review, with reasons for exclusions at    |               |
| 21 |                    |                     | each stage, ideally with a <a href="#">flow diagram</a> .     |               |
| 22 |                    |                     |                                                               |               |
| 23 |                    |                     |                                                               |               |
| 24 |                    |                     |                                                               |               |
| 25 |                    |                     |                                                               |               |
| 26 |                    |                     |                                                               |               |
| 27 | Study              | <a href="#">#18</a> | For each study, present characteristics for which data were   | Table 1 and 2 |
| 28 |                    |                     | extracted (e.g., study size, PICOS, follow-up period) and     |               |
| 29 | characteristics    |                     | provide the citation.                                         |               |
| 30 |                    |                     |                                                               |               |
| 31 |                    |                     |                                                               |               |
| 32 |                    |                     |                                                               |               |
| 33 |                    |                     |                                                               |               |
| 34 |                    |                     |                                                               |               |
| 35 | Risk of bias       | <a href="#">#19</a> | Present data on risk of bias of each study and, if available, | NA            |
| 36 |                    |                     | any outcome-level assessment (see Item 12).                   |               |
| 37 | within studies     |                     |                                                               |               |
| 38 |                    |                     |                                                               |               |
| 39 |                    |                     |                                                               |               |
| 40 | Results of         | <a href="#">#20</a> | For all outcomes considered (benefits and harms), present,    | 5-7           |
| 41 |                    |                     | for each study: (a) simple summary data for each              |               |
| 42 | individual studies |                     | intervention group and (b) effect estimates and confidence    |               |
| 43 |                    |                     | intervals, ideally with a forest plot.                        |               |
| 44 |                    |                     |                                                               |               |
| 45 |                    |                     |                                                               |               |
| 46 |                    |                     |                                                               |               |
| 47 |                    |                     |                                                               |               |
| 48 |                    |                     |                                                               |               |
| 49 |                    |                     |                                                               |               |
| 50 | Synthesis of       | <a href="#">#21</a> | Present the main results of the review. If meta-analyses      | 5-7           |
| 51 |                    |                     | are done, include for each, confidence intervals and          |               |
| 52 | results            |                     | measures of consistency.                                      |               |
| 53 |                    |                     |                                                               |               |
| 54 |                    |                     |                                                               |               |
| 55 |                    |                     |                                                               |               |
| 56 |                    |                     |                                                               |               |
| 57 |                    |                     |                                                               |               |
| 58 | Risk of bias       | <a href="#">#22</a> | Present results of any assessment of risk of bias across      | NA            |
| 59 |                    |                     |                                                               |               |
| 60 |                    |                     |                                                               |               |



|    |                   |                                                                                     |               |
|----|-------------------|-------------------------------------------------------------------------------------|---------------|
| 1  | across studies    | studies (see Item 15).                                                              |               |
| 2  |                   |                                                                                     |               |
| 3  |                   |                                                                                     |               |
| 4  | Additional        | <a href="#">#23</a> Give results of additional analyses, if done (e.g., sensitivity | Table 3 and 4 |
| 5  |                   |                                                                                     |               |
| 6  | analysis          | or subgroup analyses, meta-regression [see Item 16]).                               |               |
| 7  |                   |                                                                                     |               |
| 8  |                   |                                                                                     |               |
| 9  | <b>Discussion</b> |                                                                                     |               |
| 10 |                   |                                                                                     |               |
| 11 |                   |                                                                                     |               |
| 12 | Summary of        | <a href="#">#24</a> Summarize the main findings, including the strength of          | 7-8           |
| 13 |                   |                                                                                     |               |
| 14 | Evidence          | evidence for each main outcome; consider their relevance                            |               |
| 15 |                   |                                                                                     |               |
| 16 |                   |                                                                                     |               |
| 17 |                   | to key groups (e.g., health care providers, users, and                              |               |
| 18 |                   |                                                                                     |               |
| 19 |                   | policy makers                                                                       |               |
| 20 |                   |                                                                                     |               |
| 21 |                   |                                                                                     |               |
| 22 | Limitations       | <a href="#">#25</a> Discuss limitations at study and outcome level (e.g., risk of   | 8             |
| 23 |                   |                                                                                     |               |
| 24 |                   | bias), and at review level (e.g., incomplete retrieval of                           |               |
| 25 |                   |                                                                                     |               |
| 26 |                   | identified research, reporting bias).                                               |               |
| 27 |                   |                                                                                     |               |
| 28 |                   |                                                                                     |               |
| 29 | Conclusions       | <a href="#">#26</a> Provide a general interpretation of the results in the context  | 9             |
| 30 |                   |                                                                                     |               |
| 31 |                   | of other evidence, and implications for future research.                            |               |
| 32 |                   |                                                                                     |               |
| 33 |                   |                                                                                     |               |
| 34 |                   |                                                                                     |               |
| 35 | <b>Funding</b>    |                                                                                     |               |
| 36 |                   |                                                                                     |               |
| 37 |                   |                                                                                     |               |
| 38 | Funding           | <a href="#">#27</a> Describe sources of funding or other support (e.g., supply      | 1             |
| 39 |                   |                                                                                     |               |
| 40 |                   | of data) for the systematic review; role of funders for the                         |               |
| 41 |                   |                                                                                     |               |
| 42 |                   | systematic review.                                                                  |               |
| 43 |                   |                                                                                     |               |
| 44 |                   |                                                                                     |               |

None The PRISMA checklist is distributed under the terms of the Creative Commons Attribution License CC-BY. This checklist can be completed online using <https://www.goodreports.org/>, a tool made by the [EQUATOR Network](#) in collaboration with [Penelope.ai](#)

# BMJ Open

## A systematic review of global clinical practice guidelines for neonatal hyperbilirubinemia

|                                 |                                                                                                                                                                                                                                                                                                                                                                                                                                                                                                                                                                                                                                                                                                                                                                                                                                                                                                                                                                                                                                                                                                                                                                                                                                                                                                                                                                                                                                                                                                                                                                                                                                                                                                                                                                                                        |
|---------------------------------|--------------------------------------------------------------------------------------------------------------------------------------------------------------------------------------------------------------------------------------------------------------------------------------------------------------------------------------------------------------------------------------------------------------------------------------------------------------------------------------------------------------------------------------------------------------------------------------------------------------------------------------------------------------------------------------------------------------------------------------------------------------------------------------------------------------------------------------------------------------------------------------------------------------------------------------------------------------------------------------------------------------------------------------------------------------------------------------------------------------------------------------------------------------------------------------------------------------------------------------------------------------------------------------------------------------------------------------------------------------------------------------------------------------------------------------------------------------------------------------------------------------------------------------------------------------------------------------------------------------------------------------------------------------------------------------------------------------------------------------------------------------------------------------------------------|
| Journal:                        | <i>BMJ Open</i>                                                                                                                                                                                                                                                                                                                                                                                                                                                                                                                                                                                                                                                                                                                                                                                                                                                                                                                                                                                                                                                                                                                                                                                                                                                                                                                                                                                                                                                                                                                                                                                                                                                                                                                                                                                        |
| Manuscript ID                   | bmjopen-2020-040182.R1                                                                                                                                                                                                                                                                                                                                                                                                                                                                                                                                                                                                                                                                                                                                                                                                                                                                                                                                                                                                                                                                                                                                                                                                                                                                                                                                                                                                                                                                                                                                                                                                                                                                                                                                                                                 |
| Article Type:                   | Original research                                                                                                                                                                                                                                                                                                                                                                                                                                                                                                                                                                                                                                                                                                                                                                                                                                                                                                                                                                                                                                                                                                                                                                                                                                                                                                                                                                                                                                                                                                                                                                                                                                                                                                                                                                                      |
| Date Submitted by the Author:   | 08-Dec-2020                                                                                                                                                                                                                                                                                                                                                                                                                                                                                                                                                                                                                                                                                                                                                                                                                                                                                                                                                                                                                                                                                                                                                                                                                                                                                                                                                                                                                                                                                                                                                                                                                                                                                                                                                                                            |
| Complete List of Authors:       | Zhang, Meng; Sichuan University West China Second University Hospital; Sichuan University, Key Laboratory of Obstetrics & Gynecologic and Pediatric Diseases and Birth Defects of the Ministry of Education<br>Tang, Jun; Sichuan University West China Second University Hospital; Sichuan University, Key Laboratory of Obstetrics & Gynecologic and Pediatric Diseases and Birth Defects of the Ministry of Education<br>He, Yang; Sichuan University West China Second University Hospital; Sichuan University, Key Laboratory of Obstetrics & Gynecologic and Pediatric Diseases and Birth Defects of the Ministry of Education<br>Li, Wenxing; Sichuan University West China Second University Hospital; Sichuan University, Key Laboratory of Obstetrics & Gynecologic and Pediatric Diseases and Birth Defects of the Ministry of Education<br>Chen, Zhong; Sichuan University West China Second University Hospital; Sichuan University, Key Laboratory of Obstetrics & Gynecologic and Pediatric Diseases and Birth Defects of the Ministry of Education<br>Xiong, tao; Sichuan University West China Second University Hospital; Sichuan University, Key Laboratory of Obstetrics & Gynecologic and Pediatric Diseases and Birth Defects of the Ministry of Education<br>qu, yi; Sichuan University West China Second University Hospital; Sichuan University, Key Laboratory of Obstetrics & Gynecologic and Pediatric Diseases and Birth Defects of the Ministry of Education<br>Li, Youping; Sichuan University West China Hospital, Chinese Evidence-based Medicine Center<br>Mu, Dezhi; Sichuan University West China Second University Hospital; Sichuan University, Key Laboratory of Obstetrics & Gynecologic and Pediatric Diseases and Birth Defects of the Ministry of Education |
| <b>Primary Subject Heading</b>: | Paediatrics                                                                                                                                                                                                                                                                                                                                                                                                                                                                                                                                                                                                                                                                                                                                                                                                                                                                                                                                                                                                                                                                                                                                                                                                                                                                                                                                                                                                                                                                                                                                                                                                                                                                                                                                                                                            |
| Secondary Subject Heading:      | Paediatrics                                                                                                                                                                                                                                                                                                                                                                                                                                                                                                                                                                                                                                                                                                                                                                                                                                                                                                                                                                                                                                                                                                                                                                                                                                                                                                                                                                                                                                                                                                                                                                                                                                                                                                                                                                                            |
| Keywords:                       | NEONATOLOGY, Developmental neurology & neurodisability < PAEDIATRICS, Protocols & guidelines < HEALTH SERVICES ADMINISTRATION & MANAGEMENT                                                                                                                                                                                                                                                                                                                                                                                                                                                                                                                                                                                                                                                                                                                                                                                                                                                                                                                                                                                                                                                                                                                                                                                                                                                                                                                                                                                                                                                                                                                                                                                                                                                             |
|                                 |                                                                                                                                                                                                                                                                                                                                                                                                                                                                                                                                                                                                                                                                                                                                                                                                                                                                                                                                                                                                                                                                                                                                                                                                                                                                                                                                                                                                                                                                                                                                                                                                                                                                                                                                                                                                        |

1  
2  
3  
4  
5  
6  
7  
8  
9  
10  
11  
12  
13  
14  
15  
16  
17  
18  
19  
20  
21  
22  
23  
24  
25  
26  
27  
28  
29  
30  
31  
32  
33  
34  
35  
36  
37  
38  
39  
40  
41  
42  
43  
44  
45  
46  
47  
48  
49  
50  
51  
52  
53  
54  
55  
56  
57  
58  
59  
60

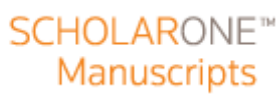



I, the Submitting Author has the right to grant and does grant on behalf of all authors of the Work (as defined in the below author licence), an exclusive licence and/or a non-exclusive licence for contributions from authors who are: i) UK Crown employees; ii) where BMJ has agreed a CC-BY licence shall apply, and/or iii) in accordance with the terms applicable for US Federal Government officers or employees acting as part of their official duties; on a worldwide, perpetual, irrevocable, royalty-free basis to BMJ Publishing Group Ltd ("BMJ") its licensees and where the relevant Journal is co-owned by BMJ to the co-owners of the Journal, to publish the Work in this journal and any other BMJ products and to exploit all rights, as set out in our [licence](#).

The Submitting Author accepts and understands that any supply made under these terms is made by BMJ to the Submitting Author unless you are acting as an employee on behalf of your employer or a postgraduate student of an affiliated institution which is paying any applicable article publishing charge ("APC") for Open Access articles. Where the Submitting Author wishes to make the Work available on an Open Access basis (and intends to pay the relevant APC), the terms of reuse of such Open Access shall be governed by a Creative Commons licence – details of these licences and which [Creative Commons](#) licence will apply to this Work are set out in our licence referred to above.

Other than as permitted in any relevant BMJ Author's Self Archiving Policies, I confirm this Work has not been accepted for publication elsewhere, is not being considered for publication elsewhere and does not duplicate material already published. I confirm all authors consent to publication of this Work and authorise the granting of this licence.

1  
2  
3  
4 **A systematic review of global clinical practice guidelines for neonatal**  
5 **hyperbilirubinemia**  
6

7 Meng Zhang, MD<sup>a,b</sup>, Jun Tang, MD, PhD<sup>a,b\*</sup>, Yang He, MD<sup>a,b</sup>, Wenxing Li, MD<sup>a,b</sup>,  
8 Zhong Chen, MD<sup>a,b</sup>, Tao Xiong, MD, PhD<sup>a,b</sup>, Yi Qu, PhD<sup>a,b</sup>, Youping Li, MD, PhD<sup>c</sup>,  
9 Dezhi Mu, MD, PhD<sup>a,b</sup>  
10

11 <sup>a</sup>West China Second Hospital, Sichuan University, Chengdu, China

12 <sup>b</sup>Key Laboratory of Obstetrics & Gynecologic and Pediatric Diseases and Birth  
13 Defects of the Ministry of Education, Sichuan University, Chengdu, China

14 <sup>c</sup>Chinese Evidence-based Medicine Center, West China Hospital, Sichuan University,  
15 Chengdu, China  
16  
17

18  
19 **\*Address correspondence to:** Jun Tang, Department of Pediatrics, West China Second  
20 Hospital, Sichuan University, No. 20, Section 3, Renmin south road, Chengdu 610041,  
21 China, [[tj1234753@sina.com](mailto:tj1234753@sina.com)]  
22

23 **Keyword:** neonatal hyperbilirubinemia, clinical practice guidelines, systematic review

24 **Word count:** 2999  
25  
26  
27  
28  
29  
30  
31  
32  
33  
34  
35  
36  
37  
38  
39  
40  
41  
42  
43  
44  
45  
46  
47  
48  
49  
50  
51  
52  
53  
54  
55  
56  
57  
58  
59  
60

## ABSTRACT

**Objective:** Hyperbilirubinemia is one of the most common clinical symptoms in newborns. To improve patient outcomes, evidence-based and implementable guidelines are required. However, clinical guidelines may vary in quality, criteria, and recommendations among regions and countries. In this study, we aimed to systematically assess the quality of guidelines using the AGREE-II instrument and summarize the specific recommendations for neonatal hyperbilirubinemia in order to provide suggestions for future guideline development.

**Design:** Systematic review.

**Interventions:** We searched the PubMed, Embase, Medline, and guideline databases for relevant articles on April 10th 2020. The studies were screened by two independent reviewers according to our inclusion criteria. Two reviewers independently extracted the descriptive data. Four appraisers assessed the guidelines using the AGREE-II instrument.

**Results:** Our systematic review appraised 12 clinical practice guidelines for the diagnosis and management of neonatal hyperbilirubinemia. The 12 guidelines achieved an average score of 36-89%. The guidelines received the highest scores for clarity of presentation and lowest scores for rigor of development. Most recommendations for diagnosis were relatively consistent, but recommendations regarding risk factors, the initiating threshold of treatment, and pharmacotherapy varied.

**Conclusions:** Our study revealed that current guidelines vary in the quality of the developing process and are inconsistent with regard to recommendations. Future guidelines should afford more attention to the quality of methodologies in guideline development, and more qualified evidence is needed to standardize the initiating threshold of treatment for neonatal hyperbilirubinemia.

### Strengths and limitations of this study

- This study is the first English systematic appraisal of guidelines targeted to neonates with hyperbilirubinemia.
- The strengths also included the use of the validated AGREE II instrument and four independent reviewers to minimize subjective bias.
- A Chinese-language guideline by the Chinese Pediatric Society was appraised.
- The AGREE-II was used to evaluate guidelines with less attention on detailed recommendations.
- We only assessed guidelines through the reported literature without the use of additional methods such as contacting guideline developers.

## INTRODUCTION

Neonatal hyperbilirubinemia, characterized by the elevation of total serum bilirubin (TSB), is one of the most common clinical conditions affecting newborns, particularly preterm infants. Hyperbilirubinemia affects approximately 60% of full-term and 80% of preterm neonates.<sup>1</sup> Approximately 10% of newborns are likely to develop clinically significant hyperbilirubinemia requiring close monitoring and treatment.<sup>2</sup> In the early period (0-6 days), neonatal hyperbilirubinemia accounted for 1309.3 deaths per 100,000 livebirths and was the seventh most common cause of neonatal deaths.<sup>3</sup> Effective and timely treatment with phototherapy or exchange transfusion can reduce the occurrence of neurological dysfunction in neonates with hyperbilirubinemia.

Clinical practice guidelines are in place to aid clinical, policy-related, and system-related decisions.<sup>4</sup> Guidelines have also been developed to bridge the gap between research and clinical practice.<sup>5</sup> Therefore, guidelines have become increasingly popular in recent years.<sup>6</sup> Although several organizations from different regions have developed clinical practice guidelines, these guidelines may vary widely in quality.<sup>7 8</sup> Moreover, the criteria for diagnosis and treatment in published guidelines vary among regions and countries.<sup>9</sup>

The Appraisal of Guidelines for Research & Evaluation (AGREE) instrument is used to assess methodological rigor and transparency of a guideline.<sup>10</sup> In this study, we aimed to systematically review and assess the quality of guidelines on neonatal hyperbilirubinemia using the AGREE-II instrument in order to provide suggestions for future guideline development.

## METHODS

### Selection criteria

We included clinical practice guidelines produced by local, regional, national or international groups or affiliated governmental organizations for the diagnosis and management of hyperbilirubinemia in newborn infants. The guidelines were included if they met the following criteria: (1) published in English or Chinese language; (2) based on systematic evidence synthesis and containing specific statements to guide decisions regarding hyperbilirubinemia; (3) include recommendations for the diagnosis and/or treatment of neonatal hyperbilirubinemia; and (5) published between 2000 and 2020, and only the most recent editions of updated guidelines were considered.

### Search strategy

A systematic literature search was performed on April 10th 2020. We searched for relevant studies in the PubMed, Embase, and Medline databases. In addition, we searched the Guidelines International Network (GIN), National Health Service (NHS) Evidence website, National Institute for Health and Care Excellence (NICE) website, Scottish Intercollegiate Guidelines Network (SIGN) website, Turning Research Into Practice Database (TRIP), and Wan fang Database. The titles and abstracts of the searched citations were screened by two independent reviewers (MZ and YH). Any

1  
2  
3 discrepancies between the reviewers were resolved by discussion. The detailed search  
4 strategy for PubMed is shown in the supplementary material.  
5  
6

### 7 **Guideline characteristics**

8 Two independent reviewers (MZ and YH) extracted the general characteristics of the  
9 included guidelines: country, founding organization, year of publication or updating  
10 status, method of evidence identification, and funding.  
11  
12

### 13 **Appraisal of guideline quality**

14 Four appraisers (MZ, YH, WXL, and ZC) independently assessed the selected  
15 guidelines using the AGREE-II instrument. The AGREE II is an international, validated,  
16 and rigorously developed tool to evaluate the quality of clinical practice guidelines and  
17 consensus statements.<sup>11</sup> The AGREE II consists of 23 key items organized within six  
18 domains (scope and purpose, stakeholder involvement, rigor of development, clarity of  
19 presentation, applicability, and editorial independence) followed by two global rating  
20 items (overall assessment). Each domain points to a unique dimension of guideline  
21 quality.<sup>12</sup> Each of the AGREE II items is rated on a seven-point scale (1 = strongly  
22 disagree to 7 = strongly agree). Domain scores are calculated by summing the scores of  
23 the individual items in a domain and by scaling the total as a percentage of the  
24 maximum possible score for that domain.<sup>12</sup> The score for each domain of each  
25 document is calculated as follows: (obtained score - minimal possible score)/(maximal  
26 possible score - minimal possible score).<sup>10</sup> All reviewers were trained online using the  
27 AGREE training tools. Discrepancies of >3 points were discussed in a consensus  
28 meeting.  
29  
30  
31  
32  
33  
34  
35

### 36 **Analysis**

37 We extracted descriptive data from the guideline recommendations to identify the  
38 consistencies and discrepancies. The recommendations were then summarized  
39 according to different items related to the diagnosis and treatment strategies of neonatal  
40 hyperbilirubinemia, such as the test used for the early prediction and diagnosis, time to  
41 start phototherapy and exchange transfusion, recommendation for drug use, criterion  
42 for discharge, and timing or frequency of follow-up. The intraclass correlation  
43 coefficients for the six domains were calculated to assess the reliability of the scores  
44 between investigators. The analysis of the reliability study was performed using  
45 Statistical Package for Social Sciences (SPSS) V.24.0.  
46  
47  
48  
49

### 50 **Patient and Public Involvement**

51 No patient involved.  
52  
53

## 54 **RESULTS**

### 55 **Search results**

56 Figure 1 illustrates the search and guideline selection process. The systematic search  
57 retrieved 725 records, of which 701 were excluded after removing duplicates and  
58 articles that did not meet the eligibility criteria. Consequently, after the full-text  
59  
60



1  
2  
3 evaluation of the remaining records, 12 additional clinical practice guidelines were  
4 excluded for the following reasons: not written in English or Chinese, not original  
5 guidelines, and not clinical practice guidelines or consensus. Ultimately, we included  
6 12 clinical practice guidelines from 12 different national or regional organizations.  
7  
8  
9

### 10 **General characteristics of the guidelines**

11 Tables 1 and 2 summarize the general characteristics of the included clinical practice  
12 guidelines. Twelve clinical practice guideline documents were published by national or  
13 regional organizations, including the American Academy of Pediatrics Subcommittee  
14 on Hyperbilirubinemia (AAP),<sup>13</sup> Canadian Pediatric Society (CPS) Fetus and Newborn  
15 Committee,<sup>14</sup> Chinese Pediatric Society (ChPS) Chinese medical Association,<sup>15</sup> Israel  
16 Neonatal Society (INS),<sup>16</sup> Italian Society of Neonatology (ISN),<sup>17</sup> Malaysia Health  
17 Technology Assessment Section (MaHTAS),<sup>18</sup> National Institute for Health and Care  
18 Excellence (NICE) in the United Kingdom,<sup>19</sup> Norwegian Pediatric Association,<sup>20</sup>  
19 Queensland Clinical Guidelines (QCG) in Australia,<sup>21</sup> Spanish Association of  
20 Pediatrics (SAP),<sup>22</sup> Swiss Society of Neonatology (SSN)<sup>23</sup> and Turkish Pediatric  
21 Association (TPA).<sup>24</sup> Five of these guidelines are new and the others have been updated  
22 or reaffirmed. Four guidelines from the United States,<sup>13</sup> Canada,<sup>14</sup> Italy,<sup>17</sup> and  
23 Switzerland<sup>23</sup> were targeted toward neonates born at >35 weeks of gestation, while the  
24 other guidelines covered all preterm and term babies. Six organizations (QCG,<sup>21</sup> CPS,  
25 <sup>14</sup> SAP, <sup>22</sup>NICE, <sup>19</sup>INS, and MaHTAS<sup>18</sup>) reported performing a systematic review and  
26 appraisal of the evidence and were explicit about the level of evidence that underpinned  
27 their recommendations. Three groups were funded by governmental institutions  
28 (QCG,<sup>21</sup> NICE,<sup>19</sup> and MaHTAS<sup>18</sup>), one declared no financial support (TPA<sup>24</sup>), and the  
29 remainder did not disclose a funding source.  
30  
31  
32  
33  
34  
35  
36

### 37 **Appraisal of guidelines**

38 Table 3 shows the scores for each guideline for the six domains of the AGREE II  
39 instrument. The overall quality of the guideline development process varied widely  
40 both among guidance documents and within guidance documents among different  
41 domains. The average score was 36.3-89.3%. Most guidelines achieved average scores  
42 of <50% in four of the six domains, and only two received an average score of >50%.  
43 The highest scores were achieved in the domains of clarity of presentation and the  
44 lowest scores were achieved for rigor of development.  
45  
46  
47  
48

49 Domain 1: the mean score for scope and purpose was 88.8±6.5% and the MaHTAS<sup>18</sup>  
50 guideline achieved the highest score at 98.6%. Domain 2: the mean stakeholder  
51 involvement score was 47.6±22.4% and ChPS<sup>15</sup> received the lowest score at 9.7%.  
52 Domain 3: The mean score for rigor of development was 31.9±22.6%. NICE<sup>19</sup> scored  
53 the highest for this domain at 85.9% with the most extensive development process,  
54 while TPA<sup>24</sup> received the lowest at only 9.9%. Domain 4: The mean score for clarity of  
55 presentation was 91.7±5.7%. For this domain, most of the guidelines obtained a score  
56 of >90%. Domain 5: The mean score for applicability was 43.0±18.9%, with five  
57 guidelines scoring <30%. Domain 6: the mean score for editorial independence was  
58  
59  
60

1  
2  
3 36.8±36.1%, and four guidelines obtained scores of 0% for this domain. In terms of  
4 overall quality, 50% of the guidelines received an average score of >50%. The NICE  
5 guidelines received the highest score at 89.3±5.7%.  
6  
7

8 Table 4 shows the intraclass correlation coefficients, 95% confidence intervals, and P  
9 values for each domain between the four evaluators. The intraclass correlation  
10 coefficients ranged from 0.818 to 0.995.  
11  
12

### 13 **Clinical guideline recommendations**

#### 14 Approaches to risk factors and diagnostic strategies for neonatal hyperbilirubinemia

15 Nine guidelines covered risk factors for severe neonatal hyperbilirubinemia, including  
16 maternal and neonatal risk factors. All guidance documents provided recommendations  
17 for diagnosis. Tables 5 and 6 show the main risk factors and some example diagnostic  
18 strategies for neonatal hyperbilirubinemia. The guidelines differed somewhat in their  
19 report of risk factors. Nearly all guidelines reported prematurity, exclusive  
20 breastfeeding, and G6PD deficiency as neonatal risk factors. Cephalohematoma or  
21 bruises and male sex were also defined as neonatal risk factors in some guidelines,  
22 while NICE<sup>25</sup> stated that the evidence was inconclusive and that the results of most  
23 studies revealed no significant association between these factors and  
24 hyperbilirubinemia.  
25  
26  
27  
28  
29

30 Visual assessment was recommended as a first step in diagnosis by most organizations,  
31 and the guideline of Malaysia<sup>18</sup> specifically mentioned that Kramer's rule could be  
32 widely practiced. All guidelines advocated TSB measurement as the gold standard for  
33 detecting and determining the level of hyperbilirubinemia. Non-invasive methods such  
34 as a transcutaneous bilirubinometer are accepted by all guidelines. Other methods of  
35 detection such icterometers were not recommended by NICE<sup>19</sup> and MaHTAS<sup>18</sup> because  
36 there was no good quality evidence to indicate their reliability. In addition, nearly all  
37 guidelines recommended additional laboratory tests for babies with prolonged  
38 hyperbilirubinemia that could be of value to evaluate and identify the underlying  
39 disease. These tests included complete blood counts, blood group compatibility, a direct  
40 antiglobulin test, septic workup, urinalysis, urine culture, thyroid functions, G6PD,  
41 reticulocyte count, and conjugated component of bilirubin.  
42  
43  
44  
45  
46

#### 47 Approaches to treatment and follow-up for neonatal hyperbilirubinemia

48 Table 7 shows the recommendations for the management of neonatal  
49 hyperbilirubinemia. The key areas included the initiating threshold and details of  
50 different types of therapies and care for babies during therapy. The guidelines  
51 distinguished treatment scenarios based on the level of hyperbilirubinemia, including  
52 phototherapy, exchange transfusion, and pharmacotherapy.  
53  
54  
55

56 All guidelines discussed the threshold of phototherapy and exchange transfusion, and  
57 most of the organizations divided patients into groups according to gestational age and  
58 risk factors. As an example, we reported the detailed initiation TSB levels for full-term  
59  
60

1  
2  
3 neonates according to the presence and absence of risk factors in table 7, finding that  
4 there were few differences among the guidelines regarding to the initiation TSB levels.  
5 The majority of the guidelines proposed a number of general care strategies during  
6 phototherapy, such as temperature measurement, eye protection, and continued  
7 breastfeeding. Among other forms of phototherapy, home phototherapy was  
8 recommended by AAP<sup>13</sup> and MaHTAS,<sup>18</sup> while sunlight exposure was not supported  
9 by four organizations (AAP, NICE, QCG, SAP). Moreover, seven guidelines  
10 mentioned the complications of phototherapy.  
11  
12  
13  
14

15 The threshold for initiating exchange transfusion was higher than that for phototherapy  
16 in all risk groups. Potential signs of acute bilirubin encephalopathy were highlighted as  
17 important in all guidelines. Most guidelines reported the details of performing exchange  
18 transfusion such as the blood product and blood volume. Double-volume exchange  
19 transfusion was advocated by the majority of guidelines. Furthermore, observations  
20 during exchange transfusion including heart rate, blood pressure, respiratory rate,  
21 oxygen saturation, and skin temperature were only proposed by three organizations  
22 (MaHTAS,<sup>18</sup> ChPS,<sup>15</sup> and ISN<sup>17</sup>). After the exchange transfusion, seven guidelines  
23 recommended maintaining intensive phototherapy and six suggested monitoring the  
24 TSB at varied time points. Pharmacotherapy was also mentioned by ten guidelines.  
25 However, the recommendation of medication varied greatly.  
26  
27  
28  
29

30 Most of the guidelines discussed follow-up after discharge, and some provided different  
31 follow-up time recommendations according to the time of discharge and risk factors. In  
32 addition, some guidelines focused on the follow-up of children with severe  
33 hyperbilirubinemia. The CPS guidelines recommend that the hearing screen of patients  
34 with severe hyperbilirubinemia should include brainstem auditory evoked potentials.  
35 The MaHTAS guideline reported that term and late preterm babies with TSB of >20  
36 mg/dL or exchange transfusions should have auditory brainstem response (ABR)  
37 testing performed within the first 3 months of life. If the ABR is abnormal,  
38 neurodevelopmental follow-up should be continued. The ABR test was also  
39 recommended by the Turkish guidelines for babies with hyperbilirubinemia requiring  
40 treatment. Moreover, two of the guidelines (SSN and ISN) mentioned the national  
41 institute for monitoring the incidence of kernicterus and severe hyperbilirubinemia.  
42  
43  
44  
45  
46  
47

## 48 **DISCUSSION**

49 This systematic review appraised 12 clinical practice guidelines for the diagnosis and  
50 management of neonatal hyperbilirubinemia. The quality of the guidelines was highly  
51 variable. The included guidelines received acceptable AGREE II scores in the domains  
52 of clarity of presentation and scope and purpose, but the mean scores were moderate or  
53 low in the stakeholder involvement, rigor of development, applicability, and editorial  
54 independence domains. This finding was similar to that of the 2010 review by Alonso-  
55 Coello et al.<sup>26</sup> In recent years, although the number of guidelines has increased, the  
56 quality of guidelines still needs to be improved.  
57  
58  
59  
60

1  
2  
3 As evaluated by the AGREE II instrument, most guidelines had good clarity regarding  
4 their objective, clinical questions, and scope. Further, as the AGREE II revealed in the  
5 stakeholder involvement domain, many guideline development groups represented a  
6 variety of relevant professional areas.<sup>12</sup> It is valuable to explore the views of the target  
7 population, i.e., healthcare providers or the parents of neonates with hyperbilirubinemia.  
8 However, although some guidelines targeted healthcare providers and parents, almost  
9 all development groups ignored the preferences of parents of the hyperbilirubinemia  
10 neonates.  
11  
12  
13

14  
15 The mean score of the rigor of development domain, which was considered the  
16 indicator of quality in all domains,<sup>27</sup> varied significantly among different guidelines.  
17 Guidelines typically received low scores in this domain because of poor reporting of  
18 systematic methods for searching for evidence and formulating recommendations, lack  
19 of external review, and updating mechanisms. Some guidelines, such as NICE,<sup>19</sup>  
20 provided detailed search strategies, evidence tables, and reasons for excluded studies to  
21 confirm their systematic methods, while some guidelines did not provide complete  
22 information regarding methods of searching and selecting evidence. Muka et al.  
23 provided a 24-step guide on how to perform a systematic review and meta-analysis in  
24 2020.<sup>28</sup> The guide described the most important 24 steps, such as defining the search  
25 strategy, designing the data collection form, checking reporting bias, etc. We suggest  
26 that these methodologically sound tools should be used to help future guideline  
27 designers conduct or appraise systematic reviews. Guidelines need to reflect current  
28 research, but most of the guidelines did not provide a statement about the procedure for  
29 updating. Alonso-Coello et al. conducted an international survey of the updating  
30 practices of guidelines in 2011 and concluded that there was an urgent need to develop  
31 rigorous international standards for the updating process.<sup>29</sup>  
32  
33  
34  
35  
36  
37

38 The clarity of presentation of the recommendations was specific and unambiguous in  
39 most guidelines. The scores of the applicability domain were highly reflective of the  
40 implementation of guidelines. Additional materials, including summary documents and  
41 educational tools, could be beneficial in this respect. However, >50% of the included  
42 guidelines did not discuss facilitators and barriers to their application or tools for  
43 practicing; thus, the guidelines might have a limited effect.<sup>30</sup> Therefore, future guideline  
44 developers should afford greater consideration to the potential resource implications  
45 and facilitators of application, particularly for guidelines published in developing  
46 regions. Regarding the editorial independence domain, the views of the funding body  
47 and interests of the developers should be reported as part of the standard practice of  
48 guideline development.  
49  
50  
51  
52  
53

54 In this study, we also summarized and compared the specific recommendations for the  
55 diagnosis and treatment of neonatal hyperbilirubinemia. All guidelines covered the  
56 threshold of phototherapy and exchange transfusion, while most of the guidelines stated  
57 that the threshold graph was reproduced and adapted with permission from the AAP<sup>13</sup>.  
58 However, the AAP noted that the suggested levels represented a consensus of  
59  
60

1  
2  
3 committee but were based on limited evidence, and the levels shown were  
4 approximations.<sup>13</sup> Therefore, more qualified studies of different populations are needed  
5 to standardize treatment methods. In terms of pharmacotherapy, variations also existed  
6 among different guidelines. The discrepancies were mainly due to varying evidence  
7 quality, limitations in generalizability, and lack of approval by a national administration.  
8  
9

10  
11 The burden of hyperbilirubinemia is highest in South Asia and sub-Saharan Africa.<sup>2</sup>  
12 Hyperbilirubinemia is the seventh leading cause of neonatal mortality in South Asia,  
13 eighth in sub-Saharan Africa, ninth in western Europe, and 13th in North America.<sup>2</sup> In  
14 our review, we appraised five guidelines from Europe with a mean score of 55.9%, four  
15 guidelines from Asian countries with mean scores of 55.2%, and two guidelines from  
16 North America with mean scores of 50.6%. In 2015, Olusanya et al. provided a practical  
17 framework for the management of late-preterm and term infants ( $\geq 35$  weeks of  
18 gestation) with clinically significant hyperbilirubinemia in low- and middle-income  
19 countries lacking local practice guidelines.<sup>31</sup> They provided recommendations for  
20 comprehensive management, including primary prevention, early detection, diagnosis,  
21 monitoring, treatment, and follow-up.<sup>31</sup>  
22  
23  
24  
25

26  
27 To our knowledge, our study is the first systematic critical appraisal of guidelines with  
28 diagnostic and treatment recommendations targeted to neonates with  
29 hyperbilirubinemia. The strengths of our review include the integration of  
30 comprehensive search strategies, use of the validated AGREE II instrument, and use of  
31 four independent reviewers to minimize subjective bias. Further, in addition to  
32 guidelines written in English, a Chinese-language guideline by the Chinese Pediatric  
33 Society was appraised in our study. As a representative of developing countries, the  
34 inclusion of Chinese-language guidelines may minimize the overestimation of the  
35 quality of guidelines to some degree.  
36  
37  
38  
39

40  
41 However, there were several possible limitations to our study. First, guidelines written  
42 entirely in languages other than English and Chinese might have been overlooked.  
43 Second, the AGREE-II was used to evaluate guidelines with less attention on detailed  
44 recommendations. Although it is thought that a global appraisal of a guideline's  
45 developing process may reflect the strength of recommendations,<sup>9</sup> the quality of  
46 specific recommendations has a direct influence on practice. Finally, we only assessed  
47 guidelines through reported literature without the use of additional methods such as  
48 contacting guideline developers to obtain further clarification. This may have  
49 underestimated the systematic methods of guideline development by organizations.  
50  
51  
52

### 53 **Conclusion**

54 Our study evaluated the quality of methodologies and rigorous strategies in the  
55 guideline development process and summarized the recommendations on the diagnosis  
56 and treatment of neonatal hyperbilirubinemia. The results revealed that current  
57 guidelines varied in the quality of the development process and were inconsistent in  
58 their recommendations, despite some similarities. Therefore, future guidelines should  
59  
60

1  
2  
3 afford greater attention to the quality of methodologies in the guideline development  
4 process, and more qualified evidence is needed to standardize the initiating threshold  
5 of treatment for neonatal hyperbilirubinemia.  
6  
7

### 8 **Contributorship statement:**

9 Dr Zhang conceptualized and designed the study, screened the titles and abstracts of  
10 searched citations, extracted general characteristics and descriptive data from  
11 guideline recommendations, assessed the selected guidelines using the AGREE-II  
12 instrument and drafted the initial manuscript.  
13

14 Prof Tang conceptualized and designed the study, coordinated and supervised  
15 guideline assessment, and critically reviewed the manuscript for important intellectual  
16 content.  
17

18 Dr He screened the titles and abstracts of searched citations, extracted general  
19 characteristics and descriptive data from guideline recommendations, assessed the  
20 selected guidelines using the AGREE-II instrument and revised the manuscript.  
21

22 Dr Wenxing Li and Dr Chen assessed the selected guidelines using the AGREE-II  
23 instrument, reviewed and revised the manuscript.  
24

25 Dr Xiong, Prof Qu, Prof Youping Li and Prof Mu coordinated and supervised  
26 guideline assessment, and critically reviewed the manuscript for important intellectual  
27 content.  
28

29 All authors approved the final manuscript as submitted and agree to be accountable for  
30 all aspects of the work.  
31

32 **Competing interests:** All authors have no conflicts of interest to disclose.

33 **Funding:** This work was supported by the National Science Foundation of China  
34 (No. 81630038, 81971433), the grant from Ministry of Education of China  
35 (IRT0935), the grant of clinical discipline program (Neonatology) from the Ministry  
36 of Health of China (1311200003303) and the grants from the Science and Technology  
37 Bureau of Sichuan Province (2020YJ0236, 2020YFS0041).  
38

39 **Data sharing statement:** All data relevant to the study are included in the article or  
40 uploaded as supplementary information.  
41  
42

### 43 **References:**

- 44 1. Bhutani VK, Stark AR, Lazzeroni LC, et al. Predischarge screening for severe neonatal  
45 hyperbilirubinemia identifies infants who need phototherapy. *J Pediatr*  
46 2013;162(3):477-82 e1. doi: 10.1016/j.jpeds.2012.08.022.  
47  
48
- 49 2. Olusanya BO, Kaplan M, Hansen TWR. Neonatal hyperbilirubinaemia: a global perspective.  
50 *Lancet Child Adolesc Health* 2018;2(8):610-20. doi: 10.1016/S2352-4642(18)30139-1.  
51  
52
- 53 3. Olusanya BO, Teeple S, Kassebaum NJ. The Contribution of Neonatal Jaundice to Global  
54  
55  
56  
57  
58  
59  
60

- 1  
2  
3  
4 Child Mortality: Findings From the GBD 2016 Study. *Pediatrics* 2018;141(2) doi:  
5  
6 10.1542/peds.2017-1471.  
7  
8
- 9 4. Shaneyfelt TM, Mayo-Smith MF, Rothwangl J. Are guidelines following guidelines? The  
10  
11 methodological quality of clinical practice guidelines in the peer-reviewed medical  
12  
13 literature. *Jama* 1999;281(20):1900-5. doi: 10.1001/jama.281.20.1900.  
14  
15
- 16 5. Jolliffe L, Lannin NA, Cadilhac DA, et al. Systematic review of clinical practice guidelines to  
17  
18 identify recommendations for rehabilitation after stroke and other acquired brain  
19  
20 injuries. *BMJ Open* 2018;8(2):e018791. doi: 10.1136/bmjopen-2017-018791.  
21  
22
- 23 6. Johnston A, Kelly SE, Hsieh SC, et al. Systematic reviews of clinical practice guidelines: a  
24  
25 methodological guide. *Journal of clinical epidemiology* 2019;108:64-76. doi:  
26  
27 10.1016/j.jclinepi.2018.11.030.  
28  
29
- 30 7. Nagler EV, Vanmassenhove J, van der Veer SN, et al. Diagnosis and treatment of  
31  
32 hyponatremia: a systematic review of clinical practice guidelines and consensus  
33  
34 statements. *BMC Med* 2014;12:1. doi: 10.1186/s12916-014-0231-1.  
35  
36
- 37 8. Li Q, Li X, Kwong JS, et al. Diagnosis and treatment for hyperuricaemia and gout: a protocol  
38  
39 for a systematic review of clinical practice guidelines and consensus statements. *BMJ*  
40  
41 *Open* 2017;7(6):e014928. doi: 10.1136/bmjopen-2016-014928.  
42  
43
- 44 9. Huang TW, Lai JH, Wu MY, et al. Systematic review of clinical practice guidelines in the  
45  
46 diagnosis and management of thyroid nodules and cancer. *BMC Med* 2013;11:191.  
47  
48 doi: 10.1186/1741-7015-11-191.  
49  
50
- 51 10. Brouwers MC, Kho ME, Browman GP, et al. AGREE II: advancing guideline development,  
52  
53 reporting and evaluation in health care. *CMAJ : Canadian Medical Association journal*  
54  
55

- 1  
2  
3  
4 = *journal de l'Association medicale canadienne* 2010;182(18):E839-42. doi:  
5  
6 10.1503/cmaj.090449.  
7  
8  
9 11. Tong A, Chapman JR, Wong G, et al. Screening and follow-up of living kidney donors: a  
10  
11 systematic review of clinical practice guidelines. *Transplantation* 2011;92(9):962-72.  
12  
13 doi: 10.1097/TP.0b013e3182328276.  
14  
15  
16 12. AGREE II training tools. . Available at: [http://www.agreetrust.org/resource-centre/agree-ii-](http://www.agreetrust.org/resource-centre/agree-ii-training-tooles/)  
17  
18 [training-tooles/](http://www.agreetrust.org/resource-centre/agree-ii-training-tooles/).  
19  
20  
21  
22 13. American Academy of Pediatrics Subcommittee on H. Management of hyperbilirubinemia  
23  
24 in the newborn infant 35 or more weeks of gestation. *Pediatrics* 2004;114(1):297-316.  
25  
26 doi: 10.1542/peds.114.1.297.  
27  
28  
29 14. Guidelines for detection, management and prevention of hyperbilirubinemia in term and late  
30  
31 preterm newborn infants (35 or more weeks' gestation) - Summary. *Paediatrics & child*  
32  
33 *health* 2007;12(5):401-18. doi: 10.1093/pch/12.5.401.  
34  
35  
36  
37 15. [Experts consensus on principles for diagnosis and treatment of neonatal jaundice].  
38  
39  
40 *Zhonghua er ke za zhi = Chinese journal of pediatrics* 2010;48(9):685-6.  
41  
42  
43 16. Kaplan M, Merlob P, Regev R. Israel guidelines for the management of neonatal  
44  
45 hyperbilirubinemia and prevention of kernicterus. *J Perinatol* 2008;28(6):389-97. doi:  
46  
47 10.1038/jp.2008.20.  
48  
49  
50 17. Romagnoli C, Barone G, Pratesi S, et al. Italian guidelines for management and treatment  
51  
52 of hyperbilirubinaemia of newborn infants  $\geq$  35 weeks' gestational age. *Ital J Pediatr*  
53  
54 2014;40(1):11. doi: 10.1186/1824-7288-40-11.  
55  
56  
57  
58 18. Section MHTA. Management of neonatal jaundice. Available at: <http://www.moh.gov.my> 2014.  
59  
60



- 1  
2  
3  
4 19. Amos RC, Jacob H, Leith W. Jaundice in newborn babies under 28 days: NICE guideline  
5  
6 2016 (CG98). *Arch Dis Child Educ Pract Ed* 2017;102(4):207-09. doi:  
7  
8 10.1136/archdischild-2016-311556.  
9  
10  
11  
12 20. Bratlid D, Nakstad B, Hansen TW. National guidelines for treatment of jaundice in the  
13  
14 newborn. *Acta paediatrica (Oslo, Norway : 1992)* 2011;100(4):499-505. doi:  
15  
16 10.1111/j.1651-2227.2010.02104.x.  
17  
18  
19  
20 21. Guidelines QC. Neonatal jaundice. Available at: [www.healthqld.gov.au/qcg](http://www.healthqld.gov.au/qcg) 2019.  
21  
22  
23 22. Sanchez-Redondo Sanchez-Gabriel MD, Leante Castellanos JL, Benavente Fernandez I,  
24  
25 et al. [Guidelines for prevention, detection and management of hyperbilirubinaemia in  
26  
27 newborns of 35 or more weeks of gestation]. *An Pediatr (Barc)* 2017;87(5):294 e1-94  
28  
29 e8. doi: 10.1016/j.anpedi.2017.03.006.  
30  
31  
32  
33 23. R. Arlettaz AB, L. Buetti, H. Fahnenstich, D. Mieth, M. Roth-Kleiner. Assessment and  
34  
35 Treatment of Jaundiced Newborn Infants 35 0/ 7 or more Weeks of Gestation. Available  
36  
37 at: <https://www.neonetch/recommendations/authored-ssn> 2007.  
38  
39  
40  
41 24. Coban A, Turkmen MK, Gursoy T. Turkish Neonatal Society guideline to the approach,  
42  
43 follow-up, and treatment of neonatal jaundice. *Turk Pediatri Ars* 2018;53(Suppl  
44  
45 1):S172-S79. doi: 10.5152/TurkPediatriArs.2018.01816.  
46  
47  
48  
49 25. (NICE). NifHaCE. Neonatal jaundice. (Clinical guideline 98. full guideline). Available at:  
50  
51 <https://www.nice.org.uk/guidance/cg98/evidence>.  
52  
53  
54 26. Alonso-Coello P, Irfan A, Sola I, et al. The quality of clinical practice guidelines over the last  
55  
56 two decades: a systematic review of guideline appraisal studies. *Qual Saf Health Care*  
57  
58 2010;19(6):e58. doi: 10.1136/qshc.2010.042077.  
59  
60

- 1  
2  
3  
4 27. Deng Y, Luo L, Hu Y, et al. Clinical practice guidelines for the management of neuropathic  
5  
6 pain: a systematic review. *BMC Anesthesiol* 2016;16:12. doi: 10.1186/s12871-015-  
7  
8 0150-5.  
9  
10  
11 28. Muka T, Glisic M, Milic J, et al. A 24-step guide on how to design, conduct, and successfully  
12  
13 publish a systematic review and meta-analysis in medical research. *European journal*  
14  
15 *of epidemiology* 2020;35(1):49-60. doi: 10.1007/s10654-019-00576-5.  
16  
17  
18 29. Alonso-Coello P, Martinez Garcia L, Carrasco JM, et al. The updating of clinical practice  
19  
20 guidelines: insights from an international survey. *Implement Sci* 2011;6:107. doi:  
21  
22 10.1186/1748-5908-6-107.  
23  
24  
25 30. Sabharwal S, Patel NK, Gauher S, et al. High methodologic quality but poor applicability:  
26  
27 assessment of the AAOS guidelines using the AGREE II instrument. *Clin Orthop Relat*  
28  
29 *Res* 2014;472(6):1982-8. doi: 10.1007/s11999-014-3530-0.  
30  
31  
32 31. Olusanya BO, Ogunlesi TA, Kumar P, et al. Management of late-preterm and term infants  
33  
34 with hyperbilirubinaemia in resource-constrained settings. *BMC Pediatr* 2015;15:39.  
35  
36  
37  
38  
39  
40  
41  
42  
43  
44  
45  
46  
47  
48  
49  
50  
51  
52  
53  
54  
55  
56  
57  
58  
59  
60

1  
2  
3 **Legends:**  
4  
5

6 **Figure 1. Study selection diagram**  
7

8 **Table 1. General characteristics of included guidelines**

9 **Table 2. General characteristics of included guidelines**

10  
11 **Table 3. Domain scores (%) of the nine guidelines assessed by using the AGREE-**  
12 **II instrument**

13 **Table 4. Inter rater reliability study results**

14 **Table 5. Summary of risk factors of severe neonatal jaundice**

15 **Table 6. Summary of recommendations for approaches to diagnosis of neonatal**  
16 **hyperbilirubinemia**

17 **Table 7. Summary of recommendations for approaches to treatment of neonatal**  
18 **hyperbilirubinemia**  
19  
20  
21  
22  
23  
24  
25  
26  
27  
28  
29  
30  
31  
32  
33  
34  
35  
36  
37  
38  
39  
40  
41  
42  
43  
44  
45  
46  
47  
48  
49  
50  
51  
52  
53  
54  
55  
56  
57  
58  
59  
60

Table 1 General characteristics

| Guidelines | Organization (country)                                                      | Last update year<br>(update times) | Target population                            |                                                     | Target users                                      |
|------------|-----------------------------------------------------------------------------|------------------------------------|----------------------------------------------|-----------------------------------------------------|---------------------------------------------------|
|            |                                                                             |                                    | Inclusion criteria                           | Exclusion criteria                                  |                                                   |
| QCG        | Queensland Clinical Guidelines (Australia)                                  | 2019 (7)                           | All preterm and term babies                  | Conjugated hyperbilirubinaemia, surgical management | Parents and carers                                |
| CPS        | Canadian Pediatric Society, Fetus and Newborn Committee (Canada)            | 2018 (1)                           | Newborn Infants $\geq$ 35 Weeks of Gestation | Not reported                                        | Not reported                                      |
| TPA        | Turkish Pediatric Association (Turkey)                                      | 2018 (0)                           | All preterm and term babies                  | Not reported                                        | Pediatricians and family physicians               |
| SAP        | Spanish Association of Pediatrics (Spain)                                   | 2017 (0)                           | All preterm and term babies                  | Not reported                                        | Not reported                                      |
| NICE       | National Institute for Health and Care Excellence (the United Kingdom)      | 2016 (1)                           | All preterm and term babies                  | Conjugated hyperbilirubinaemia, surgical management | Healthcare professionals, families and carers     |
| ChPS       | Chinese Pediatric Society, Chinese Medical Association (China)              | 2014 (1)                           | All preterm and term babies                  | Not reported                                        | Not reported                                      |
| ISN        | Italian Society of Neonatology (Italy)                                      | 2014 (0)                           | Newborn Infants $\geq$ 35 Weeks of Gestation | Not reported                                        | Neonatologists and family pediatricians           |
| MaHTAS     | Malaysia Health Technology Assessment Section (Malaysia)                    | 2014 (1)                           | All preterm and term babies                  | Conjugated hyperbilirubinaemia, prolonged jaundice  | Pediatricians and pharmacists, parents and carers |
| NPA        | Norwegian Pediatric Association (Norway)                                    | 2010 (0)                           | All preterm and term babies                  | Not reported                                        | Healthcare personnel                              |
| AAP        | American Academy of Pediatrics Subcommittee on Hyperbilirubinemia (America) | 2009 (1)                           | Newborn Infants $\geq$ 35 Weeks of Gestation | Not reported                                        | Healthcare personnel                              |
| INS        | Israel Neonatal Society (Israel)                                            | 2008 (0)                           | All preterm and term babies                  | Not reported                                        | Neonatologists, pediatricians and family doctors  |
| SSN        | Swiss Society of Neonatology (Swiss)                                        | 2007 (2)                           | Newborn Infants $\geq$ 35 Weeks of Gestation | Not reported                                        | Not reported                                      |

QCG: Queensland Clinical Guidelines (Australia); CPS: Canadian Pediatric Society, Fetus and Newborn Committee (Canada); TPA: Turkish Pediatric Association (Turkey); SAP: Spanish Association of Pediatrics (Spain); NICE: National Institute for Health and Care Excellence (the United Kingdom); ChPS: Chinese Pediatric Society, Chinese Medical Association (China); ISN: Italian Society of Neonatology (Italy); MaHTAS: Malaysia Health Technology

1  
2  
3  
4  
5  
6  
7  
8  
9  
10  
11  
12  
13  
14  
15  
16  
17  
18  
19  
20  
21  
22  
23  
24  
25  
26  
27  
28  
29  
30  
31  
32  
33  
34  
35  
36  
37  
38  
39  
40  
41  
42  
43  
44  
45  
46

Assessment Section (Malaysia); NPA: Norwegian Pediatric Association (Norway); AAP: American Academy of Pediatrics Subcommittee on Hyperbilirubinemia (America); INS: Israel Neonatal Society (Israel); SSN: Swiss Society of Neonatology (Swiss).

For peer review only

Table 2 General characteristics

| Guidelines | identification of evidence                                                             |              |              |                             |                                 | guideline review<br>process | Findings                                          |
|------------|----------------------------------------------------------------------------------------|--------------|--------------|-----------------------------|---------------------------------|-----------------------------|---------------------------------------------------|
|            | database                                                                               | search terms | dates        | detailed search<br>strategy | inclusion/exclusion<br>criteria |                             |                                                   |
| QCG        | PubMed, CINAHL, Medline, Cochrane Central Register of Controlled Trials, EBSCO, Embase | Reported     | After 2004   | Not reported                | Not reported                    | Not reported                | Healthcare Improvement Unit, Queensland Health    |
| CPS        | MEDLINE, the Cochrane library                                                          | Reported     | Before 2007  | Not reported                | Not reported                    | Reported                    | Not reported                                      |
| TPA        | Not reported                                                                           | Not reported | Not reported | Not reported                | Not reported                    | Not reported                | No financial support                              |
| SAP        | PubMed                                                                                 | Reported     | Not reported | Not reported                | Not reported                    | Not reported                | Not reported                                      |
| NICE       | Medline, EBM Reviews, CDSR, DARE, Embase, CINAHL                                       | Reported     | Before 2008  | Reported                    | Not reported                    | Not reported                | National Institute for Health and Care Excellence |
| ChPS       | Not reported                                                                           | Not reported | Not reported | Not reported                | Not reported                    | Not reported                | Not reported                                      |
| ISN        | Guidelines from other countries, Studies in Italy                                      | Not reported | Before 2013  | Not reported                | Not reported                    | Not reported                | Not reported                                      |
| MaHTAS     | GIN, Medline, Pubmed, CDSR                                                             | Reported     | After 2001   | Reported                    | Reported                        | External review             | Ministry of Health Malaysia                       |
| NPA        | Not reported                                                                           | Not reported | Not reported | Not reported                | Not reported                    | Not reported                | Not reported                                      |
| AAP        | Not reported                                                                           | Not reported | Not reported | Not reported                | Not reported                    | Peer review                 | Not reported                                      |
| INS        | Not reported                                                                           | Not reported | Not reported | Not reported                | Not reported                    | Not reported                | Not reported                                      |
| SSN        | Not reported                                                                           | Not reported | Not reported | Not reported                | Not reported                    | Not reported                | Not reported                                      |

QCG: Queensland Clinical Guidelines (Australia); CPS: Canadian Pediatric Society, Fetus and Newborn Committee (Canada); TPA: Turkish Pediatric Association (Turkey); SAP: Spanish Association of Pediatrics (Spain); NICE: National Institute for Health and Care Excellence (the United Kingdom); ChPS: Chinese Pediatric Society, Chinese Medical Association (China); ISN: Italian Society of Neonatology (Italy); MaHTAS: Malaysia Health Technology Assessment Section (Malaysia); NPA: Norwegian Pediatric Association (Norway); AAP: American Academy of Pediatrics Subcommittee on Hyperbilirubinemia (America); INS: Israel Neonatal Society (Israel); SSN: Swiss Society of Neonatology (Swiss).

1  
2  
3  
4  
5  
6  
7  
8  
9  
10  
11  
12  
13  
14  
15  
16  
17  
18  
19  
20  
21  
22  
23  
24  
25  
26  
27  
28  
29  
30  
31  
32  
33  
34  
35  
36  
37  
38  
39  
40  
41  
42  
43  
44  
45  
46

**Table 3 Domain scores (%) of the nine guidelines assessed by using the AGREE-II instrument (%)**

|                 | NICE     | MaHTAS  | QCG       | ISN       | AAP       | TPA       | NPA       | INS       | SAP       | SSN       | CPS       | ChPS      | mean±SD   |
|-----------------|----------|---------|-----------|-----------|-----------|-----------|-----------|-----------|-----------|-----------|-----------|-----------|-----------|
| <b>Domain 1</b> | 91.7     | 98.6    | 91.7      | 90.3      | 97.2      | 84.7      | 86.1      | 87.5      | 73.6      | 90.3      | 91.7      | 81.9      | 88.8±6.5  |
| <b>Domain 2</b> | 93.1     | 61.1    | 66.7      | 61.1      | 51.4      | 44.4      | 50.0      | 56.9      | 18.1      | 36.1      | 22.2      | 9.7       | 47.6±22.4 |
| <b>Domain 3</b> | 85.9     | 62.5    | 51.0      | 17.2      | 40.6      | 9.9       | 19.8      | 18.2      | 28.1      | 17.2      | 22.4      | 10.4      | 31.9±22.6 |
| <b>Domain 4</b> | 98.6     | 98.6    | 98.6      | 94.4      | 94.4      | 87.5      | 80.6      | 83.3      | 91.7      | 88.9      | 94.4      | 88.9      | 91.7±5.7  |
| <b>Domain 5</b> | 85.4     | 64.6    | 61.5      | 26.0      | 38.5      | 25.0      | 57.3      | 37.5      | 24.0      | 39.6      | 29.2      | 27.1      | 43.0±18.9 |
| <b>Domain 6</b> | 81.3     | 89.6    | 31.3      | 64.6      | 25.0      | 93.8      | 0.0       | 4.2       | 52.1      | 0.0       | 0.0       | 0.0       | 36.8±36.1 |
| <b>mean±SD</b>  | 89.3±5.7 | 79%±17% | 66.8±23.0 | 58.9±29.2 | 57.9±27.9 | 57.6±32.8 | 49.0±30.8 | 47.9±31.1 | 47.9±27.2 | 45.3±33.9 | 43.3±36.3 | 36.3±35.7 |           |

Domain 1: scope and purpose; Domain 2: stakeholder involvement; Domain 3: rigor of development; Domain 4: clarity of presentation; Domain 5: applicability; Domain 6: editorial independence.

NICE: National Institute for Health and Care Excellence (the United Kingdom); MaHTAS: Malaysia Health Technology Assessment Section (Malaysia); QCG: Queensland Clinical Guidelines (Australia); INS: Israel Neonatal Society (Israel); AAP: American Academy of Pediatrics Subcommittee on Hyperbilirubinemia (America); TPA: Turkish Pediatric Association (Turkey); NPA: Norwegian Pediatric Association (Norway); ISN: Italian Society of Neonatology (Italy); SAP: Spanish Association of Pediatrics (Spain); SSN: Swiss Society of Neonatology (Swiss); CPS: Canadian Pediatric Society, Fetus and Newborn Committee (Canada); ChPS: Chinese Pediatric Society, Chinese Medical Association (China).

**Table 4 Inter rater reliability study results**

|                 | ICC   | n  | k | Lower 95% CI | Upper 95% CI | P value |
|-----------------|-------|----|---|--------------|--------------|---------|
| <b>Domain 1</b> | 0.863 | 12 | 4 | 0.670        | 0.956        | 0.000   |
| <b>Domain 2</b> | 0.989 | 12 | 4 | 0.974        | 0.997        | 0.000   |
| <b>Domain 3</b> | 0.994 | 12 | 4 | 0.986        | 0.998        | 0.000   |
| <b>Domain 4</b> | 0.818 | 12 | 4 | 0.561        | 0.941        | 0.000   |
| <b>Domain 5</b> | 0.995 | 12 | 4 | 0.988        | 0.998        | 0.000   |
| <b>Domain 6</b> | 0.993 | 12 | 4 | 0.984        | 0.998        | 0.000   |

Domain 1: scope and purpose; Domain 2: stakeholder involvement; Domain 3: rigor of development; Domain 4: clarity of presentation; Domain 5: applicability; Domain 6: editorial independence.



Table 5 Summary of risk factors of severe neonatal jaundice

|                                                                     | NICE | MaHTAS | QCG | INS | AAP | TPA | NPA | ISN | SAP | SSN | CPS | ChPS |
|---------------------------------------------------------------------|------|--------|-----|-----|-----|-----|-----|-----|-----|-----|-----|------|
| <b>Maternal</b>                                                     |      |        |     |     |     |     |     |     |     |     |     |      |
| Blood group O                                                       | NA   | +      | +   | +   | +   | NA  | NA  | NA  | NA  | NA  | +   | NA   |
| Rhesus negative                                                     | +    | +      | +   | +   | +   | NA  | NA  | NA  | NA  | NA  | +   | NA   |
| Diabetes                                                            | NA   | +      | +   | NA  | +   | NA   |
| <b>Neonatal</b>                                                     |      |        |     |     |     |     |     |     |     |     |     |      |
| G6PD deficiency                                                     | +    | +      | +   | +   | +   | +   | NA  | NA  | +   | NA  | +   | +    |
| Under 38 weeks                                                      | +    | +      | +   | NA  | +   | +   | NA  | NA  | +   | NA  | +   | +    |
| Exclusive breastfeeding                                             | +    | +      | +   | NA  | +   | NA  | NA  | NA  | +   | NA  | +   | +    |
| Cephalhaematoma or bruises                                          | -    | +      | +   | NA  | +   | NA  | NA  | NA  | +   | NA  | +   | +    |
| Sepsis                                                              | +    | +      | +   | NA  | +   | +   | NA  | NA  | +   | NA  | -   | +    |
| Sibling with severe hyperbilirubinemia                              | NA   | +      | NA  | +   | NA  | NA  | NA  | NA  | NA  | NA  | +   | NA   |
| Sibling with clinically significant jaundice requiring phototherapy | +    | NA     | +   | NA  | +   | NA   |
| Visible jaundice at younger than 24 h                               | +    | +      | NA  | +   | +   | NA  | NA  | NA  | NA  | NA  | +   | NA   |
| Male                                                                | -    | NA     | +   | NA  | +   | NA  | NA  | NA  | NA  | NA  | +   | NA   |

NA: not available

NICE: National Institute for Health and Care Excellence (the United Kingdom); MaHTAS: Malaysia Health Technology Assessment Section (Malaysia); QCG: Queensland Clinical Guidelines (Australia); INS: Israel Neonatal Society (Israel); AAP: American Academy of Pediatrics Subcommittee on Hyperbilirubinemia (America); TPA: Turkish Pediatric Association (Turkey); NPA: Norwegian Pediatric Association (Norway); ISN: Italian Society of Neonatology (Italy); SAP: Spanish Association of Pediatrics (Spain); SSN: Swiss Society of Neonatology (Swiss); CPS: Canadian Pediatric Society, Fetus and Newborn Committee (Canada); ChPS: Chinese Pediatric Society, Chinese Medical Association (China).

Table 6 Summary of recommendations for approaches to diagnosis of neonatal hyperbilirubinemia

|                                             | NICE | MaHTAS | QCG | ISN | AAP | TPA | NPA | INS | SAP | SSN | CPS | ChPS |
|---------------------------------------------|------|--------|-----|-----|-----|-----|-----|-----|-----|-----|-----|------|
| <b>Clinical assessment</b>                  |      |        |     |     |     |     |     |     |     |     |     |      |
| Visual assessment (do not rely on it alone) | +    | +      | +   | NA  | +   | +   | NA  | NA  | +   | +   | NA  | NA   |
| <b>Measurement of bilirubin</b>             |      |        |     |     |     |     |     |     |     |     |     |      |
| TCB transcutaneous bilirubinometer          | +    | +      | +   | +   | +   | +   | +   | +   | +   | +   | +   | +    |
| TSB                                         | +    | +      | +   | +   | +   | +   | +   | +   | +   | +   | +   | +    |
| B/A                                         | -    | -      | NA  | NA  | +   | NA  | NA  | NA  | NA  | NA  | NA  | +    |
| Ictrometer                                  | -    | -      | NA  | +    |
| <b>Test for prolonged jaundice</b>          |      |        |     |     |     |     |     |     |     |     |     |      |
| Blood group compatibility                   | +    | +      | +   | +   | +   | +   | NA  | +   | +   | +   | +   | NA   |
| Direct antiglobulin test (DAT)              | +    | +      | +   | +   | +   | +   | NA  | +   | +   | +   | +   | NA   |
| G6PD                                        | +    | +      | +   | +   | +   | +   | NA  | +   | +   | NA  | +   | NA   |
| Conjugated component of bilirubin           | +    | NA     | +   | NA  | +   | +   | NA  | +   | +   | +   | +   | NA   |
| Complete blood count                        | +    | +      | +   | +   | +   | +   | NA  | NA  | NA  | NA  | +   | NA   |
| Septic workup (if suspected)                | +    | +      | +   | NA  | +   | +   | NA  | NA  | +   | NA  | +   | NA   |
| Thyroid functions                           | NA   | NA     | +   | NA  | +   | +   | NA  | +   | +   | NA  | NA  | NA   |
| Urinalysis, urine culture                   | NA   | NA     | +   | NA  | +   | +   | NA  | +   | +   | NA  | NA  | NA   |
| Reticulocyte count                          | NA   | +      | +   | NA  | +   | +   | NA  | NA  | NA  | NA  | NA  | NA   |

NA: not available

NICE: National Institute for Health and Care Excellence (the United Kingdom); MaHTAS: Malaysia Health Technology Assessment Section (Malaysia); QCG: Queensland Clinical Guidelines (Australia); INS: Israel Neonatal Society (Israel); AAP: American Academy of Pediatrics Subcommittee on Hyperbilirubinemia (America); TPA: Turkish Pediatric Association (Turkey); NPA: Norwegian Pediatric Association (Norway); ISN: Italian Society of Neonatology (Italy); SAP: Spanish Association of Pediatrics (Spain); SSN: Swiss Society of Neonatology (Swiss); CPS: Canadian Pediatric Society, Fetus and Newborn Committee (Canada); ChPS: Chinese Pediatric Society, Chinese Medical Association (China).

Table 7 Summary of recommendations for approaches to treatment of neonatal hyperbilirubinemia

|                                                                                        | NICE              | MaHTAS    | QCG       | ISN       | AAP      | TPA       | NPA | INS      | SAP  | SSN | CPS | ChPS      |     |
|----------------------------------------------------------------------------------------|-------------------|-----------|-----------|-----------|----------|-----------|-----|----------|------|-----|-----|-----------|-----|
| <b>Phototherapy</b>                                                                    |                   |           |           |           |          |           |     |          |      |     |     |           |     |
| Conventional irradiance ( $\mu\text{W}/\text{cm}^2/\text{nm}$ )                        | NA                | >15       | 25-30     | NA        | NA       | 8-10      | NA  | NA       | 8-12 | NA  | NA  | 8-10      |     |
| Intensive irradiance ( $\mu\text{W}/\text{cm}^2/\text{nm}$ )                           | NA                | >30       | >30       | > 35      | >30      | 30-65     | >20 | >30      | >30  | NA  | >30 | >30       |     |
| Distance between light and baby (cm)                                                   | NA                | < 30 - 50 | 10–15     | NA        | About 10 | 35-40     | 20  | about 10 | 10   | NA  | 10  | NA        |     |
| Intensive phototherapy threshold for fullterm babies >96h ( $\mu\text{mol}/\text{L}$ ) | Well              | 350       | 359       | 359       | 343      | 359       | 359 | 359      | 359  | 359 | 350 | 359       | 359 |
|                                                                                        | With risk factors | NA        | 308       | 308       | NA       | 308       | 291 | 308      | 308  | 308 | 300 | 257       | 308 |
| Home phototherapy                                                                      | NA                | NA        | +         | NA        | +        | NA        | NA  | +        | NA   | NA  | NA  | NA        |     |
| Sunlight Exposure                                                                      | -                 | NA        | -         | NA        | -        | NA        | NA  | -        | -    | NA  | NA  | NA        |     |
| Complications                                                                          | +                 | NA        | +         | NA        | +        | +         | NA  | +        | NA   | NA  | +   | +         |     |
| <b>Exchange transfusion</b>                                                            |                   |           |           |           |          |           |     |          |      |     |     |           |     |
| Exchange transfusion threshold for fullterm babies >96h ( $\mu\text{mol}/\text{L}$ )   | Well              | 450       | 428       | 428       | 428      | 428       | 428 | 450      | 428  | 428 | 430 | 428       | 428 |
|                                                                                        | With risk factors | NA        | 393       | 393       | NA       | 376       | 393 | NA       | 376  | 376 | 370 | 325       | 376 |
| Detail observation during ET                                                           | NA                | +         | NA        | +         | NA       | NA        | NA  | NA       | NA   | NA  | NA  | +         |     |
| Maintain intensive PT after ET                                                         | +                 | +         | +         | +         | NA       | +         | NA  | NA       | NA   | NA  | +   | +         |     |
| Measure TSB after ET                                                                   | within 2h         | 4 – 6h    | within 2h | within 2h | NA       | within 2h | NA  | NA       | NA   | NA  | NA  | within 4h |     |
| Complications                                                                          | +                 | +         | +         | +         | +        | +         | NA  | +        | NA   | NA  | +   | NA        |     |
| <b>Pharmacotherapy</b>                                                                 |                   |           |           |           |          |           |     |          |      |     |     |           |     |
| Intravenous immunoglobulin                                                             | +                 | -         | -         | +         | +        | +         | NA  | +        | +    | NA  | +   | +         |     |
| Human albumin                                                                          | -                 | -         | -         | NA        | NA       | NA        | NA  | NA       | NA   | NA  | NA  | +         |     |
| Clofibrate                                                                             | -                 | -         | -         | NA        | NA       | NA        | NA  | NA       | NA   | NA  | NA  | NA        |     |
| Tin-mesoporphyrin                                                                      | NA                | -         | NA        | NA        | -        | NA        | NA  | NA       | NA   | NA  | +   | NA        |     |

1  
2  
3  
4  
5 NA: not available

6 NICE: National Institute for Health and Care Excellence (the United Kingdom); MaHTAS: Malaysia Health Technology Assessment Section (Malaysia); QCG: Queensland Clinical Guidelines (Australia); INS: Israel Neonatal  
7 Society (Israel); AAP: American Academy of Pediatrics Subcommittee on Hyperbilirubinemia (America); TPA: Turkish Pediatric Association (Turkey); NPA: Norwegian Pediatric Association (Norway); ISN: Italian Society of  
8 Neonatology (Italy); SAP: Spanish Association of Pediatrics (Spain); SSN: Swiss Society of Neonatology (Swiss); CPS: Canadian Pediatric Society, Fetus and Newborn Committee (Canada); ChPS: Chinese Pediatric Society,  
9 Chinese Medical Association (China).  
10  
11  
12  
13  
14  
15  
16  
17  
18  
19  
20  
21  
22  
23  
24  
25  
26  
27  
28  
29  
30  
31  
32  
33  
34  
35  
36  
37  
38  
39  
40  
41  
42  
43  
44  
45  
46

For peer review only

**Figure 1 Study selection diagram**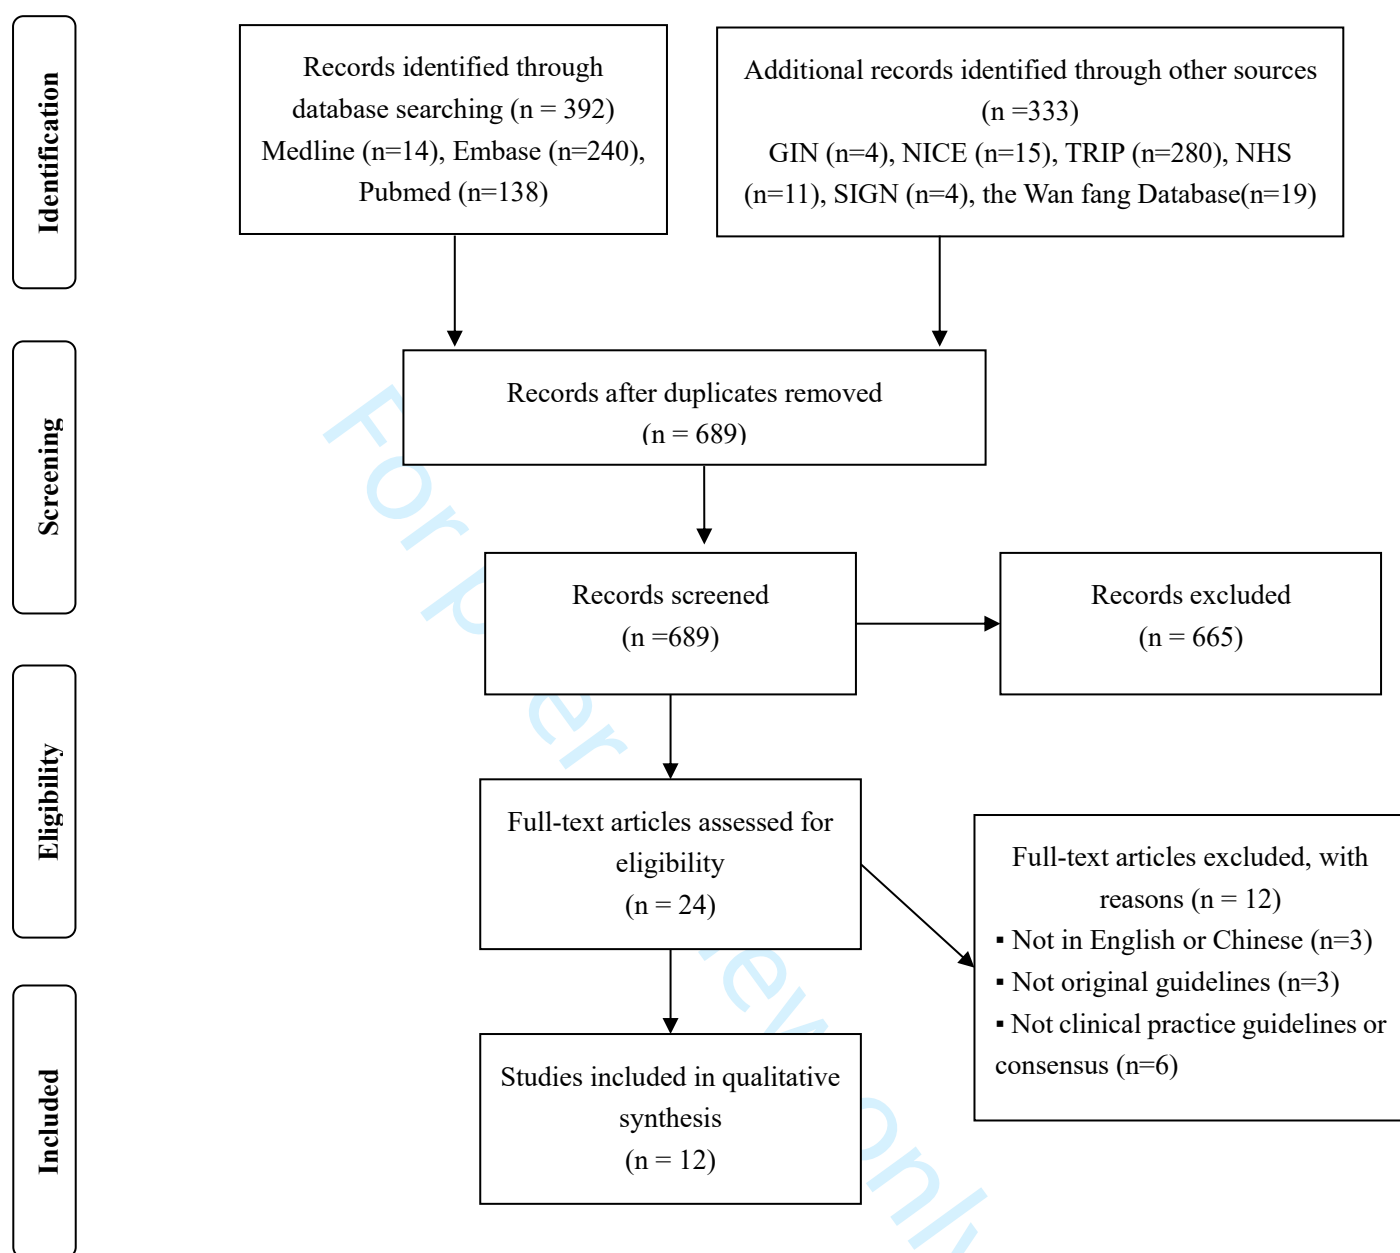

GIN: the Guidelines International Network, NICE: the National Institute for Health and Care Excellence, TRIP: the Turning Research Into Practice Database, NHS: the National Health Service Evidence, SIGN: the Scottish Intercollegiate Guidelines Network

## Searching strategy of PubMed

#1 Neonatal hyperbilirubinemia [Mesh] OR Neonatal Hyperbilirubinemia OR  
Hyperbilirubinemia During Infancy OR During Infancies, Hyperbilirubinemia OR  
Infancy, Hyperbilirubinemia During OR Indirect Hyperbilirubinemia, Neonatal OR  
Hyperbilirubinemia, Neonatal Indirect OR Neonatal Indirect Hyperbilirubinemia OR  
Direct Hyperbilirubinemia, Neonatal OR Hyperbilirubinemia, Neonatal Direct OR  
Neonatal Direct Hyperbilirubinemia

#2 Jaundice, Neonatal [Mesh] OR Neonatal Jaundice OR Physiological Neonatal  
Jaundice OR Jaundice, Physiological Neonatal OR Neonatal Jaundice, Physiological  
OR Severe Jaundice in Newborn OR Severe Jaundice in Neonate OR Icterus Gravis  
Neonatorum

#3 Clinical practice guidelines [Mesh]

#4 #1 OR #2

#5 #3 AND #4

# Reporting checklist for systematic review and meta-analysis.

Based on the PRISMA guidelines.

## Instructions to authors

Complete this checklist by entering the page numbers from your manuscript where readers will find each of the items listed below.

Your article may not currently address all the items on the checklist. Please modify your text to include the missing information. If you are certain that an item does not apply, please write "n/a" and provide a short explanation.

Upload your completed checklist as an extra file when you submit to a journal.

In your methods section, say that you used the PRISMA reporting guidelines, and cite them as:

Moher D, Liberati A, Tetzlaff J, Altman DG, The PRISMA Group. Preferred Reporting Items for Systematic Reviews and Meta-Analyses: The PRISMA Statement

|                 | Reporting Item                                                                         | Page Number |
|-----------------|----------------------------------------------------------------------------------------|-------------|
| <b>Title</b>    |                                                                                        |             |
|                 | <a href="#">#1</a> Identify the report as a systematic review, meta-analysis, or both. | 1           |
| <b>Abstract</b> |                                                                                        |             |
| Structured      | <a href="#">#2</a> Provide a structured summary including, as applicable:              | 2           |

|    |                      |                    |                                                                 |     |
|----|----------------------|--------------------|-----------------------------------------------------------------|-----|
| 1  | summary              |                    | background; objectives; data sources; study eligibility         |     |
| 2  |                      |                    |                                                                 |     |
| 3  |                      |                    | criteria, participants, and interventions; study appraisal and  |     |
| 4  |                      |                    |                                                                 |     |
| 5  |                      |                    | synthesis methods; results; limitations; conclusions and        |     |
| 6  |                      |                    |                                                                 |     |
| 7  |                      |                    | implications of key findings; systematic review registration    |     |
| 8  |                      |                    |                                                                 |     |
| 9  |                      |                    | number                                                          |     |
| 10 |                      |                    |                                                                 |     |
| 11 |                      |                    |                                                                 |     |
| 12 | <b>Introduction</b>  |                    |                                                                 |     |
| 13 |                      |                    |                                                                 |     |
| 14 |                      |                    |                                                                 |     |
| 15 |                      |                    |                                                                 |     |
| 16 | Rationale            | <a href="#">#3</a> | Describe the rationale for the review in the context of what    | 3   |
| 17 |                      |                    | is already known.                                               |     |
| 18 |                      |                    |                                                                 |     |
| 19 |                      |                    |                                                                 |     |
| 20 |                      |                    |                                                                 |     |
| 21 | Objectives           | <a href="#">#4</a> | Provide an explicit statement of questions being addressed      | 3   |
| 22 |                      |                    | with reference to participants, interventions, comparisons,     |     |
| 23 |                      |                    | outcomes, and study design (PICOS).                             |     |
| 24 |                      |                    |                                                                 |     |
| 25 |                      |                    |                                                                 |     |
| 26 |                      |                    |                                                                 |     |
| 27 |                      |                    |                                                                 |     |
| 28 | <b>Methods</b>       |                    |                                                                 |     |
| 29 |                      |                    |                                                                 |     |
| 30 |                      |                    |                                                                 |     |
| 31 |                      |                    |                                                                 |     |
| 32 | Protocol and         | <a href="#">#5</a> | Indicate if a review protocol exists, if and where it can be    | NA  |
| 33 | registration         |                    | accessed (e.g., Web address) and, if available, provide         |     |
| 34 |                      |                    | registration information including the registration number.     |     |
| 35 |                      |                    |                                                                 |     |
| 36 |                      |                    |                                                                 |     |
| 37 |                      |                    |                                                                 |     |
| 38 |                      |                    |                                                                 |     |
| 39 | Eligibility criteria | <a href="#">#6</a> | Specify study characteristics (e.g., PICOS, length of follow-   | 3   |
| 40 |                      |                    | up) and report characteristics (e.g., years considered,         |     |
| 41 |                      |                    | language, publication status) used as criteria for eligibility, |     |
| 42 |                      |                    | giving rational                                                 |     |
| 43 |                      |                    |                                                                 |     |
| 44 |                      |                    |                                                                 |     |
| 45 |                      |                    |                                                                 |     |
| 46 |                      |                    |                                                                 |     |
| 47 |                      |                    |                                                                 |     |
| 48 |                      |                    |                                                                 |     |
| 49 | Information          | <a href="#">#7</a> | Describe all information sources in the search (e.g.,           | 3-4 |
| 50 | sources              |                    | databases with dates of coverage, contact with study            |     |
| 51 |                      |                    | authors to identify additional studies) and date last           |     |
| 52 |                      |                    | searched.                                                       |     |
| 53 |                      |                    |                                                                 |     |
| 54 |                      |                    |                                                                 |     |
| 55 |                      |                    |                                                                 |     |
| 56 |                      |                    |                                                                 |     |
| 57 |                      |                    |                                                                 |     |
| 58 |                      |                    |                                                                 |     |
| 59 |                      |                    |                                                                 |     |
| 60 |                      |                    |                                                                 |     |



|    |                    |                     |                                                               |               |
|----|--------------------|---------------------|---------------------------------------------------------------|---------------|
| 1  | Search             | <a href="#">#8</a>  | Present full electronic search strategy for at least one      | The           |
| 2  |                    |                     | database, including any limits used, such that it could be    | supplementary |
| 3  |                    |                     | repeated.                                                     | material      |
| 4  |                    |                     |                                                               |               |
| 5  |                    |                     |                                                               |               |
| 6  |                    |                     |                                                               |               |
| 7  |                    |                     |                                                               |               |
| 8  | Study selection    | <a href="#">#9</a>  | State the process for selecting studies (i.e., for screening, | 3-4           |
| 9  |                    |                     | for determining eligibility, for inclusion in the systematic  |               |
| 10 |                    |                     | review, and, if applicable, for inclusion in the meta-        |               |
| 11 |                    |                     | analysis).                                                    |               |
| 12 |                    |                     |                                                               |               |
| 13 |                    |                     |                                                               |               |
| 14 |                    |                     |                                                               |               |
| 15 |                    |                     |                                                               |               |
| 16 |                    |                     |                                                               |               |
| 17 |                    |                     |                                                               |               |
| 18 |                    |                     |                                                               |               |
| 19 | Data collection    | <a href="#">#10</a> | Describe the method of data extraction from reports (e.g.,    | 4             |
| 20 |                    |                     | piloted forms, independently by two reviewers) and any        |               |
| 21 | process            |                     | processes for obtaining and confirming data from              |               |
| 22 |                    |                     | investigators.                                                |               |
| 23 |                    |                     |                                                               |               |
| 24 |                    |                     |                                                               |               |
| 25 |                    |                     |                                                               |               |
| 26 |                    |                     |                                                               |               |
| 27 |                    |                     |                                                               |               |
| 28 |                    |                     |                                                               |               |
| 29 | Data items         | <a href="#">#11</a> | List and define all variables for which data were sought      | 4             |
| 30 |                    |                     | (e.g., PICOS, funding sources), and any assumptions and       |               |
| 31 |                    |                     | simplifications made.                                         |               |
| 32 |                    |                     |                                                               |               |
| 33 |                    |                     |                                                               |               |
| 34 |                    |                     |                                                               |               |
| 35 |                    |                     |                                                               |               |
| 36 | Risk of bias in    | <a href="#">#12</a> | Describe methods used for assessing risk of bias in           | NA            |
| 37 |                    |                     | individual studies (including specification of whether this   |               |
| 38 | individual studies |                     | was done at the study or outcome level, or both), and how     |               |
| 39 |                    |                     | this information is to be used in any data synthesis.         |               |
| 40 |                    |                     |                                                               |               |
| 41 |                    |                     |                                                               |               |
| 42 |                    |                     |                                                               |               |
| 43 |                    |                     |                                                               |               |
| 44 |                    |                     |                                                               |               |
| 45 |                    |                     |                                                               |               |
| 46 | Summary            | <a href="#">#13</a> | State the principal summary measures (e.g., risk ratio,       | 4             |
| 47 |                    |                     | difference in means).                                         |               |
| 48 | measures           |                     |                                                               |               |
| 49 |                    |                     |                                                               |               |
| 50 |                    |                     |                                                               |               |
| 51 | Planned            | <a href="#">#14</a> | Describe the methods of handling data and combining           | 4             |
| 52 |                    |                     | results of studies, if done, including measures of            |               |
| 53 | methods of         |                     | consistency (e.g., I <sup>2</sup> ) for each meta-analysis.   |               |
| 54 |                    |                     |                                                               |               |
| 55 | analysis           |                     |                                                               |               |
| 56 |                    |                     |                                                               |               |
| 57 |                    |                     |                                                               |               |
| 58 |                    |                     |                                                               |               |
| 59 |                    |                     |                                                               |               |
| 60 |                    |                     |                                                               |               |

|    |                    |                     |                                                               |               |
|----|--------------------|---------------------|---------------------------------------------------------------|---------------|
| 1  | Risk of bias       | <a href="#">#15</a> | Specify any assessment of risk of bias that may affect the    | NA            |
| 2  |                    |                     |                                                               |               |
| 3  | across studies     |                     | cumulative evidence (e.g., publication bias, selective        |               |
| 4  |                    |                     | reporting within studies).                                    |               |
| 5  |                    |                     |                                                               |               |
| 6  |                    |                     |                                                               |               |
| 7  |                    |                     |                                                               |               |
| 8  |                    |                     |                                                               |               |
| 9  | Additional         | <a href="#">#16</a> | Describe methods of additional analyses (e.g., sensitivity    | 4             |
| 10 |                    |                     |                                                               |               |
| 11 | analyses           |                     | or subgroup analyses, meta-regression), if done, indicating   |               |
| 12 |                    |                     | which were pre-specified.                                     |               |
| 13 |                    |                     |                                                               |               |
| 14 |                    |                     |                                                               |               |
| 15 |                    |                     |                                                               |               |
| 16 | <b>Results</b>     |                     |                                                               |               |
| 17 |                    |                     |                                                               |               |
| 18 |                    |                     |                                                               |               |
| 19 | Study selection    | <a href="#">#17</a> | Give numbers of studies screened, assessed for eligibility,   | Figure 1      |
| 20 |                    |                     | and included in the review, with reasons for exclusions at    |               |
| 21 |                    |                     | each stage, ideally with a <a href="#">flow diagram</a> .     |               |
| 22 |                    |                     |                                                               |               |
| 23 |                    |                     |                                                               |               |
| 24 |                    |                     |                                                               |               |
| 25 |                    |                     |                                                               |               |
| 26 |                    |                     |                                                               |               |
| 27 | Study              | <a href="#">#18</a> | For each study, present characteristics for which data were   | Table 1 and 2 |
| 28 |                    |                     |                                                               |               |
| 29 | characteristics    |                     | extracted (e.g., study size, PICOS, follow-up period) and     |               |
| 30 |                    |                     | provide the citation.                                         |               |
| 31 |                    |                     |                                                               |               |
| 32 |                    |                     |                                                               |               |
| 33 |                    |                     |                                                               |               |
| 34 |                    |                     |                                                               |               |
| 35 | Risk of bias       | <a href="#">#19</a> | Present data on risk of bias of each study and, if available, | NA            |
| 36 |                    |                     |                                                               |               |
| 37 | within studies     |                     | any outcome-level assessment (see Item 12).                   |               |
| 38 |                    |                     |                                                               |               |
| 39 |                    |                     |                                                               |               |
| 40 | Results of         | <a href="#">#20</a> | For all outcomes considered (benefits and harms), present,    | 5-7           |
| 41 |                    |                     |                                                               |               |
| 42 | individual studies |                     | for each study: (a) simple summary data for each              |               |
| 43 |                    |                     | intervention group and (b) effect estimates and confidence    |               |
| 44 |                    |                     | intervals, ideally with a forest plot.                        |               |
| 45 |                    |                     |                                                               |               |
| 46 |                    |                     |                                                               |               |
| 47 |                    |                     |                                                               |               |
| 48 |                    |                     |                                                               |               |
| 49 |                    |                     |                                                               |               |
| 50 | Synthesis of       | <a href="#">#21</a> | Present the main results of the review. If meta-analyses      | 5-7           |
| 51 |                    |                     |                                                               |               |
| 52 | results            |                     | are done, include for each, confidence intervals and          |               |
| 53 |                    |                     | measures of consistency.                                      |               |
| 54 |                    |                     |                                                               |               |
| 55 |                    |                     |                                                               |               |
| 56 |                    |                     |                                                               |               |
| 57 |                    |                     |                                                               |               |
| 58 | Risk of bias       | <a href="#">#22</a> | Present results of any assessment of risk of bias across      | NA            |
| 59 |                    |                     |                                                               |               |
| 60 |                    |                     |                                                               |               |

|    |                   |                                                                                     |               |
|----|-------------------|-------------------------------------------------------------------------------------|---------------|
| 1  | across studies    | studies (see Item 15).                                                              |               |
| 2  |                   |                                                                                     |               |
| 3  |                   |                                                                                     |               |
| 4  | Additional        | <a href="#">#23</a> Give results of additional analyses, if done (e.g., sensitivity | Table 3 and 4 |
| 5  |                   |                                                                                     |               |
| 6  | analysis          | or subgroup analyses, meta-regression [see Item 16]).                               |               |
| 7  |                   |                                                                                     |               |
| 8  |                   |                                                                                     |               |
| 9  | <b>Discussion</b> |                                                                                     |               |
| 10 |                   |                                                                                     |               |
| 11 |                   |                                                                                     |               |
| 12 | Summary of        | <a href="#">#24</a> Summarize the main findings, including the strength of          | 7-8           |
| 13 |                   |                                                                                     |               |
| 14 | Evidence          | evidence for each main outcome; consider their relevance                            |               |
| 15 |                   |                                                                                     |               |
| 16 |                   |                                                                                     |               |
| 17 |                   | to key groups (e.g., health care providers, users, and                              |               |
| 18 |                   |                                                                                     |               |
| 19 |                   | policy makers                                                                       |               |
| 20 |                   |                                                                                     |               |
| 21 |                   |                                                                                     |               |
| 22 | Limitations       | <a href="#">#25</a> Discuss limitations at study and outcome level (e.g., risk of   | 8             |
| 23 |                   |                                                                                     |               |
| 24 |                   | bias), and at review level (e.g., incomplete retrieval of                           |               |
| 25 |                   |                                                                                     |               |
| 26 |                   | identified research, reporting bias).                                               |               |
| 27 |                   |                                                                                     |               |
| 28 |                   |                                                                                     |               |
| 29 | Conclusions       | <a href="#">#26</a> Provide a general interpretation of the results in the context  | 9             |
| 30 |                   |                                                                                     |               |
| 31 |                   | of other evidence, and implications for future research.                            |               |
| 32 |                   |                                                                                     |               |
| 33 |                   |                                                                                     |               |
| 34 |                   |                                                                                     |               |
| 35 | <b>Funding</b>    |                                                                                     |               |
| 36 |                   |                                                                                     |               |
| 37 |                   |                                                                                     |               |
| 38 | Funding           | <a href="#">#27</a> Describe sources of funding or other support (e.g., supply      | 1             |
| 39 |                   |                                                                                     |               |
| 40 |                   | of data) for the systematic review; role of funders for the                         |               |
| 41 |                   |                                                                                     |               |
| 42 |                   | systematic review.                                                                  |               |
| 43 |                   |                                                                                     |               |
| 44 |                   |                                                                                     |               |

None The PRISMA checklist is distributed under the terms of the Creative Commons Attribution License CC-BY. This checklist can be completed online using <https://www.goodreports.org/>, a tool made by the [EQUATOR Network](#) in collaboration with [Penelope.ai](#)
