# Supplementary material for: Systematic review of global clinical practice guidelines for neonatal hyperbilirubinemia
Source: PubMed Central journal article supplement — BMJ Open. 2021 Jan 18;11(1):e040182. doi: 10.1136/bmjopen-2020-040182 (PMC7817798; doi:10.1136/bmjopen-2020-040182), 2021-01-18
Supplement: bmjopen-2020-040182supp001.pdf [file bmjopen-2020-040182supp001.pdf]

## Searching strategy of PubMed

#1 Neonatal hyperbilirubinemia [Mesh] OR Neonatal Hyperbilirubinemia OR Hyperbilirubinemia During Infancy OR During Infancies, Hyperbilirubinemia OR Infancy, Hyperbilirubinemia During OR Indirect Hyperbilirubinemia, Neonatal OR Hyperbilirubinemia, Neonatal Indirect OR Neonatal Indirect Hyperbilirubinemia OR Direct Hyperbilirubinemia, Neonatal OR Hyperbilirubinemia, Neonatal Direct OR Neonatal Direct Hyperbilirubinemia

#2 Jaundice, Neonatal [Mesh] OR Neonatal Jaundice OR Physiological Neonatal Jaundice OR Jaundice, Physiological Neonatal OR Neonatal Jaundice, Physiological OR Severe Jaundice in Newborn OR Severe Jaundice in Neonate OR Icterus Gravis Neonatorum

#3 Clinical practice guidelines [Mesh]

#4 #1 OR #2

#5 #3 AND #4
